# Supplementary material
Source: publisher figshare collection journal article supplement (https://acs.figshare.com/ndownloader/files/3824134)

# Opening access to new chiral macrocycles: from allenes to spiranes

*Silvia Castro-Fernández, María Magdalena Cid, Carlos Silva López\*, José Lorenzo*

*Alonso-Gómez\**

Department of Organic Chemistry, Facultade de Química, Universidade de Vigo,  
36310 Vigo, Spain

DFT energies and number of imaginary frequencies

|                                     | CAM-B3LYP/6-31G* |          | M062x/6-31G*   |          |
|-------------------------------------|------------------|----------|----------------|----------|
|                                     | SCF Energy       | N. Imag. | SCF Energy     | N. Imag. |
| (P <sub>4</sub> )-DEA               | -1384.78609266   | 0        | -1385.02539388 | 0        |
| (P <sub>4</sub> )-DES               | -4451.23457228   | 0        | -4452.0543129  | 0        |
| (P <sub>2</sub> )-DEAp              | -939.32304450    | 0        | -939.47749723  | 0        |
| (P <sub>2</sub> )-DESp              | -2472.55921778   | 0        | -2473.00417990 | 0        |
| (P <sub>2</sub> )-DEA <sub>bp</sub> | -1186.29582271   | 0        | -1186.48602605 | 0        |
| (P <sub>2</sub> )-DES <sub>bp</sub> | -2719.52272382   | 0        | -2720.00368506 | 0        |
| (P)-DEA                             | -347.36050390    | 0        | -347.41673671  | 0        |
| (P)-DES                             | -1113.97158027   | 0        | -1114.17295098 | 0        |

CAM-B3LYP/6-31G\* XYZ geometries ( Å ):

(P<sub>4</sub>)-DEA

|   |          |          |          |
|---|----------|----------|----------|
| C | 0.66924  | -4.91441 | 0.14442  |
| C | -0.66924 | -4.91441 | -0.14442 |
| C | 1.85373  | -4.8717  | 0.39384  |
| C | -1.85373 | -4.8717  | -0.39384 |
| C | 3.24169  | -4.78615 | 0.72977  |
| C | 4.03121  | -4.03121 | 0.       |
| C | -3.24169 | -4.78615 | -0.72977 |
| C | -4.03121 | -4.03121 | 0.       |
| C | 4.78615  | -3.24169 | -0.72977 |
| C | -4.78615 | -3.24169 | 0.72977  |
| C | 4.8717   | -1.85373 | -0.39384 |
| C | 4.91441  | -0.66924 | -0.14442 |

|   |          |          |          |
|---|----------|----------|----------|
| C | -4.8717  | -1.85373 | 0.39384  |
| C | -4.91441 | -0.66924 | 0.14442  |
| C | 4.91441  | 0.66924  | 0.14442  |
| C | 4.8717   | 1.85373  | 0.39384  |
| C | 4.78615  | 3.24169  | 0.72977  |
| C | 4.03121  | 4.03121  | 0.       |
| C | 3.24169  | 4.78615  | -0.72977 |
| C | 1.85373  | 4.8717   | -0.39384 |
| C | 0.66924  | 4.91441  | -0.14442 |
| C | -0.66924 | 4.91441  | 0.14442  |
| C | -1.85373 | 4.8717   | 0.39384  |
| C | -3.24169 | 4.78615  | 0.72977  |
| C | -4.03121 | 4.03121  | 0.       |
| C | -4.78615 | 3.24169  | -0.72977 |
| C | -4.8717  | 1.85373  | -0.39384 |
| C | -4.91441 | 0.66924  | -0.14442 |
| C | 5.55714  | 3.72912  | 1.93786  |
| H | 5.2406   | 3.18441  | 2.83237  |
| H | 6.62867  | 3.55262  | 1.80314  |
| H | 5.39121  | 4.79609  | 2.09667  |
| C | 3.72912  | 5.55714  | -1.93786 |
| H | 3.18441  | 5.2406   | -2.83237 |
| H | 3.55262  | 6.62867  | -1.80314 |
| H | 4.79609  | 5.39121  | -2.09667 |
| C | -5.55714 | 3.72912  | -1.93786 |
| H | -5.2406  | 3.18441  | -2.83237 |
| H | -6.62867 | 3.55262  | -1.80314 |
| H | -5.39121 | 4.79609  | -2.09667 |
| C | -3.72912 | 5.55714  | 1.93786  |
| H | -3.18441 | 5.2406   | 2.83237  |
| H | -3.55262 | 6.62867  | 1.80314  |
| H | -4.79609 | 5.39121  | 2.09667  |
| C | 3.72912  | -5.55714 | 1.93786  |
| H | 3.18441  | -5.2406  | 2.83237  |
| H | 3.55262  | -6.62867 | 1.80314  |
| H | 4.79609  | -5.39121 | 2.09667  |
| C | 5.55714  | -3.72912 | -1.93786 |
| H | 5.2406   | -3.18441 | -2.83237 |
| H | 6.62867  | -3.55262 | -1.80314 |
| H | 5.39121  | -4.79609 | -2.09667 |
| C | -3.72912 | -5.55714 | -1.93786 |
| H | -3.18441 | -5.2406  | -2.83237 |
| H | -3.55262 | -6.62867 | -1.80314 |
| H | -4.79609 | -5.39121 | -2.09667 |
| C | -5.55714 | -3.72912 | 1.93786  |
| H | -5.2406  | -3.18441 | 2.83237  |
| H | -6.62867 | -3.55262 | 1.80314  |
| H | -5.39121 | -4.79609 | 2.09667  |

**(P<sub>4</sub>)-DES**

|   |         |         |         |
|---|---------|---------|---------|
| C | 5.83696 | 2.36063 | 3.3961  |
| C | 5.82789 | 3.44991 | 4.26496 |
| C | 6.05024 | 4.72433 | 3.74699 |
| C | 6.28174 | 4.90166 | 2.36841 |

|   |          |          |          |
|---|----------|----------|----------|
| C | 6.29257  | 3.8292   | 1.49767  |
| C | 6.06614  | 2.53745  | 2.01662  |
| H | 5.66454  | 1.35923  | 3.77005  |
| H | 5.64797  | 3.30333  | 5.32347  |
| H | 6.46874  | 3.96879  | 0.43759  |
| C | 6.50115  | 6.37994  | 2.05082  |
| C | 6.35217  | 7.02509  | 3.42706  |
| C | 6.44437  | 8.36583  | 3.76495  |
| C | 6.09373  | 6.04608  | 4.40552  |
| C | 6.27362  | 8.72899  | 5.10599  |
| H | 6.64231  | 9.11106  | 3.00286  |
| C | 5.92471  | 6.40733  | 5.73993  |
| C | 6.01706  | 7.75943  | 6.08165  |
| H | 6.33943  | 9.7716   | 5.39176  |
| H | 5.72521  | 5.65845  | 6.49775  |
| H | 5.88768  | 8.06163  | 7.11367  |
| C | 7.85302  | 6.65871  | 1.39664  |
| C | 9.11958  | 6.37594  | 1.88239  |
| C | 7.67719  | 7.282    | 0.14647  |
| C | 10.22694 | 6.72478  | 1.10029  |
| H | 9.2424   | 5.89494  | 2.84626  |
| C | 8.77901  | 7.6297   | -0.63148 |
| C | 10.05693 | 7.34471  | -0.14265 |
| H | 11.22626 | 6.51203  | 1.45993  |
| H | 8.65059  | 8.10931  | -1.59511 |
| H | 10.92713 | 7.60601  | -0.73272 |
| C | 5.52654  | 6.92692  | 1.00987  |
| C | 6.22907  | 7.44819  | -0.0951  |
| C | 4.14583  | 6.94615  | 1.05683  |
| C | 5.53827  | 7.99802  | -1.17306 |
| C | 3.44207  | 7.50191  | -0.03167 |
| H | 3.60732  | 6.54288  | 1.90652  |
| C | 4.14554  | 8.0222   | -1.13649 |
| H | 6.07     | 8.39999  | -2.02757 |
| C | 2.01526  | 7.53628  | -0.01947 |
| H | 3.58215  | 8.44276  | -1.9599  |
| C | 6.06276  | 1.40554  | 1.14812  |
| C | 6.05335  | 0.44223  | 0.41013  |
| C | 0.80219  | 7.56185  | -0.00807 |
| C | 4.14554  | -8.0222  | 1.13649  |
| C | 5.53827  | -7.99802 | 1.17306  |
| C | 6.22907  | -7.44819 | 0.0951   |
| C | 5.52654  | -6.92692 | -1.00987 |
| C | 4.14583  | -6.94615 | -1.05683 |
| C | 3.44207  | -7.50191 | 0.03167  |
| H | 3.58215  | -8.44276 | 1.9599   |
| H | 6.07     | -8.39999 | 2.02757  |
| H | 3.60732  | -6.54288 | -1.90652 |
| C | 6.50115  | -6.37994 | -2.05082 |
| C | 7.85302  | -6.65871 | -1.39664 |
| C | 9.11958  | -6.37594 | -1.88239 |
| C | 7.67719  | -7.282   | -0.14647 |
| C | 10.22694 | -6.72478 | -1.10029 |
| H | 9.2424   | -5.89494 | -2.84626 |
| C | 8.77901  | -7.6297  | 0.63148  |
| C | 10.05693 | -7.34471 | 0.14265  |

|   |           |          |          |
|---|-----------|----------|----------|
| H | 11.22626  | -6.51203 | -1.45993 |
| H | 8.65059   | -8.10931 | 1.59511  |
| H | 10.92713  | -7.60601 | 0.73272  |
| C | 6.35217   | -7.02509 | -3.42706 |
| C | 6.44437   | -8.36583 | -3.76495 |
| C | 6.09373   | -6.04608 | -4.40552 |
| C | 6.27362   | -8.72899 | -5.10599 |
| H | 6.64231   | -9.11106 | -3.00286 |
| C | 5.92471   | -6.40733 | -5.73993 |
| C | 6.01706   | -7.75943 | -6.08165 |
| H | 6.33943   | -9.7716  | -5.39176 |
| H | 5.72521   | -5.65845 | -6.49775 |
| H | 5.88768   | -8.06163 | -7.11367 |
| C | 6.28174   | -4.90166 | -2.36841 |
| C | 6.05024   | -4.72433 | -3.74699 |
| C | 6.29257   | -3.8292  | -1.49767 |
| C | 5.82789   | -3.44991 | -4.26496 |
| C | 6.06614   | -2.53745 | -2.01662 |
| H | 6.46874   | -3.96879 | -0.43759 |
| C | 5.83696   | -2.36063 | -3.3961  |
| H | 5.64797   | -3.30333 | -5.32347 |
| C | 6.06276   | -1.40554 | -1.14812 |
| H | 5.66454   | -1.35923 | -3.77005 |
| C | 2.01526   | -7.53628 | 0.01947  |
| C | 0.80219   | -7.56185 | 0.00807  |
| C | 6.05335   | -0.44223 | -0.41013 |
| C | -5.83696  | 2.36063  | -3.3961  |
| C | -5.82789  | 3.44991  | -4.26496 |
| C | -6.05024  | 4.72433  | -3.74699 |
| C | -6.28174  | 4.90166  | -2.36841 |
| C | -6.29257  | 3.8292   | -1.49767 |
| C | -6.06614  | 2.53745  | -2.01662 |
| H | -5.66454  | 1.35923  | -3.77005 |
| H | -5.64797  | 3.30333  | -5.32347 |
| H | -6.46874  | 3.96879  | -0.43759 |
| C | -6.50115  | 6.37994  | -2.05082 |
| C | -6.35217  | 7.02509  | -3.42706 |
| C | -6.44437  | 8.36583  | -3.76495 |
| C | -6.09373  | 6.04608  | -4.40552 |
| C | -6.27362  | 8.72899  | -5.10599 |
| H | -6.64231  | 9.11106  | -3.00286 |
| C | -5.92471  | 6.40733  | -5.73993 |
| C | -6.01706  | 7.75943  | -6.08165 |
| H | -6.33943  | 9.7716   | -5.39176 |
| H | -5.72521  | 5.65845  | -6.49775 |
| H | -5.88768  | 8.06163  | -7.11367 |
| C | -7.85302  | 6.65871  | -1.39664 |
| C | -9.11958  | 6.37594  | -1.88239 |
| C | -7.67719  | 7.282    | -0.14647 |
| C | -10.22694 | 6.72478  | -1.10029 |
| H | -9.2424   | 5.89494  | -2.84626 |
| C | -8.77901  | 7.6297   | 0.63148  |
| C | -10.05693 | 7.34471  | 0.14265  |
| H | -11.22626 | 6.51203  | -1.45993 |
| H | -8.65059  | 8.10931  | 1.59511  |
| H | -10.92713 | 7.60601  | 0.73272  |

|   |           |          |          |
|---|-----------|----------|----------|
| C | -5.52654  | 6.92692  | -1.00987 |
| C | -6.22907  | 7.44819  | 0.0951   |
| C | -4.14583  | 6.94615  | -1.05683 |
| C | -5.53827  | 7.99802  | 1.17306  |
| C | -3.44207  | 7.50191  | 0.03167  |
| H | -3.60732  | 6.54288  | -1.90652 |
| C | -4.14554  | 8.0222   | 1.13649  |
| H | -6.07     | 8.39999  | 2.02757  |
| C | -2.01526  | 7.53628  | 0.01947  |
| H | -3.58215  | 8.44276  | 1.9599   |
| C | -6.06276  | 1.40554  | -1.14812 |
| C | -6.05335  | 0.44223  | -0.41013 |
| C | -0.80219  | 7.56185  | 0.00807  |
| C | -4.14554  | -8.0222  | -1.13649 |
| C | -5.53827  | -7.99802 | -1.17306 |
| C | -6.22907  | -7.44819 | -0.0951  |
| C | -5.52654  | -6.92692 | 1.00987  |
| C | -4.14583  | -6.94615 | 1.05683  |
| C | -3.44207  | -7.50191 | -0.03167 |
| H | -3.58215  | -8.44276 | -1.9599  |
| H | -6.07     | -8.39999 | -2.02757 |
| H | -3.60732  | -6.54288 | 1.90652  |
| C | -6.50115  | -6.37994 | 2.05082  |
| C | -7.85302  | -6.65871 | 1.39664  |
| C | -9.11958  | -6.37594 | 1.88239  |
| C | -7.67719  | -7.282   | 0.14647  |
| C | -10.22694 | -6.72478 | 1.10029  |
| H | -9.2424   | -5.89494 | 2.84626  |
| C | -8.77901  | -7.6297  | -0.63148 |
| C | -10.05693 | -7.34471 | -0.14265 |
| H | -11.22626 | -6.51203 | 1.45993  |
| H | -8.65059  | -8.10931 | -1.59511 |
| H | -10.92713 | -7.60601 | -0.73272 |
| C | -6.35217  | -7.02509 | 3.42706  |
| C | -6.44437  | -8.36583 | 3.76495  |
| C | -6.09373  | -6.04608 | 4.40552  |
| C | -6.27362  | -8.72899 | 5.10599  |
| H | -6.64231  | -9.11106 | 3.00286  |
| C | -5.92471  | -6.40733 | 5.73993  |
| C | -6.01706  | -7.75943 | 6.08165  |
| H | -6.33943  | -9.7716  | 5.39176  |
| H | -5.72521  | -5.65845 | 6.49775  |
| H | -5.88768  | -8.06163 | 7.11367  |
| C | -6.28174  | -4.90166 | 2.36841  |
| C | -6.05024  | -4.72433 | 3.74699  |
| C | -6.29257  | -3.8292  | 1.49767  |
| C | -5.82789  | -3.44991 | 4.26496  |
| C | -6.06614  | -2.53745 | 2.01662  |
| H | -6.46874  | -3.96879 | 0.43759  |
| C | -5.83696  | -2.36063 | 3.3961   |
| H | -5.64797  | -3.30333 | 5.32347  |
| C | -6.06276  | -1.40554 | 1.14812  |
| H | -5.66454  | -1.35923 | 3.77005  |
| C | -2.01526  | -7.53628 | -0.01947 |
| C | -0.80219  | -7.56185 | -0.00807 |
| C | -6.05335  | -0.44223 | 0.41013  |

**(P<sub>2</sub>)-DEAp**

|   |          |          |          |
|---|----------|----------|----------|
| C | 0.11745  | -1.19391 | 4.04225  |
| C | 0.       | 0.       | 4.74063  |
| H | 0.20992  | -2.14457 | 4.55469  |
| C | -0.11465 | 1.14553  | 2.64516  |
| C | -0.11745 | 1.19391  | 4.04225  |
| H | 0.       | 0.       | 5.82611  |
| H | -0.20992 | 2.14457  | 4.55469  |
| N | 0.       | 0.       | 1.96534  |
| C | -0.24611 | 2.31038  | 1.81195  |
| C | -0.37226 | 3.11288  | 0.91685  |
| C | -0.57783 | 3.89383  | -0.2716  |
| C | 0.18711  | 3.58164  | -1.2943  |
| C | 0.93828  | 3.08002  | -2.25042 |
| C | 0.51607  | 1.80875  | -2.7639  |
| C | 0.11465  | -1.14553 | 2.64516  |
| C | 0.24611  | -2.31038 | 1.81195  |
| C | 0.37226  | -3.11288 | 0.91685  |
| C | 0.57783  | -3.89383 | -0.2716  |
| C | -0.18711 | -3.58164 | -1.2943  |
| C | -0.93828 | -3.08002 | -2.25042 |
| C | -0.51607 | -1.80875 | -2.7639  |
| C | -0.18722 | -0.65893 | -2.9676  |
| C | 0.18722  | 0.65893  | -2.9676  |
| C | -1.72471 | 4.92089  | -0.30943 |
| H | -2.50796 | 4.60526  | 0.34769  |
| H | -1.3587  | 5.87597  | 0.00481  |
| H | -2.10433 | 4.99502  | -1.30707 |
| C | 2.26777  | 3.68636  | -2.73664 |
| H | 2.17003  | 4.74951  | -2.80774 |
| H | 3.04496  | 3.44532  | -2.04181 |
| H | 2.51206  | 3.28554  | -3.69818 |
| C | 1.72471  | -4.92089 | -0.30943 |
| H | 2.50796  | -4.60526 | 0.34769  |
| H | 1.3587   | -5.87597 | 0.00481  |
| H | 2.10433  | -4.99502 | -1.30707 |
| C | -2.26777 | -3.68636 | -2.73664 |
| H | -3.04496 | -3.44532 | -2.04181 |
| H | -2.51206 | -3.28554 | -3.69818 |
| H | -2.17003 | -4.74951 | -2.80774 |

**(P<sub>2</sub>)-DESp**

|   |          |          |         |
|---|----------|----------|---------|
| C | -0.30442 | 1.15663  | 6.18146 |
| C | -0.29262 | 1.10998  | 4.78334 |
| C | 0.       | 0.       | 6.88314 |
| C | 0.30442  | -1.15663 | 6.18146 |
| H | 0.54707  | -2.08282 | 6.68932 |
| C | 0.29262  | -1.10998 | 4.78334 |
| H | 0.       | 0.       | 7.96859 |
| N | 0.       | 0.       | 4.09672 |
| H | -0.54707 | 2.08282  | 6.68932 |

|   |          |          |          |
|---|----------|----------|----------|
| C | 3.56644  | 8.51724  | 0.06865  |
| C | 3.58489  | 7.38648  | -0.74098 |
| C | 2.40406  | 6.67655  | -0.92542 |
| C | 1.21912  | 7.09625  | -0.309   |
| C | 1.20114  | 8.22252  | 0.49527  |
| C | 2.3859   | 8.93074  | 0.68394  |
| H | 4.48048  | 9.0817   | 0.22483  |
| H | 4.50742  | 7.06493  | -1.2153  |
| H | 0.28103  | 8.54827  | 0.97125  |
| H | 2.38922  | 9.81352  | 1.31567  |
| C | 0.05575  | 6.18512  | -0.69736 |
| C | 0.77092  | 5.1298   | -1.53206 |
| C | 0.25912  | 3.95602  | -2.04499 |
| C | 2.12818  | 5.44688  | -1.67776 |
| C | 1.11984  | 3.07161  | -2.71611 |
| H | -0.77952 | 3.68162  | -1.89418 |
| C | 2.97298  | 4.60425  | -2.39176 |
| C | 2.46595  | 3.42003  | -2.90731 |
| H | 4.02417  | 4.84519  | -2.51741 |
| H | 3.11723  | 2.72932  | -3.43164 |
| C | -0.73961 | 5.61225  | 0.47071  |
| C | -0.32832 | 4.70222  | 1.4249   |
| C | -2.06117 | 6.07735  | 0.44435  |
| C | -1.25231 | 4.25006  | 2.37991  |
| H | 0.68104  | 4.30437  | 1.42479  |
| C | -2.96895 | 5.66847  | 1.41428  |
| C | -2.55991 | 4.75864  | 2.37857  |
| H | -3.99323 | 6.0286   | 1.40626  |
| H | -3.26144 | 4.40247  | 3.12508  |
| C | -1.02571 | 6.96851  | -1.44012 |
| C | -2.23638 | 6.9276   | -0.73924 |
| C | -0.91615 | 7.68099  | -2.62174 |
| C | -3.3521  | 7.60428  | -1.21837 |
| C | -2.03576 | 8.35495  | -3.10431 |
| H | 0.02433  | 7.7136   | -3.16365 |
| C | -3.24218 | 8.31844  | -2.40681 |
| H | -4.29472 | 7.57491  | -0.6798  |
| H | -1.96758 | 8.91416  | -4.0322  |
| H | -4.10462 | 8.85054  | -2.79612 |
| C | -0.89096 | 3.21156  | 3.29555  |
| C | -0.60993 | 2.2735   | 4.00187  |
| C | 0.64457  | 1.77656  | -3.07873 |
| C | 0.23124  | 0.64394  | -3.2039  |
| C | 3.24218  | -8.31844 | -2.40681 |
| C | 3.3521   | -7.60428 | -1.21837 |
| C | 2.23638  | -6.9276  | -0.73924 |
| C | 1.02571  | -6.96851 | -1.44012 |
| C | 0.91615  | -7.68099 | -2.62174 |
| C | 2.03576  | -8.35495 | -3.10431 |
| H | 4.10462  | -8.85054 | -2.79612 |
| H | 4.29472  | -7.57491 | -0.6798  |
| H | -0.02433 | -7.7136  | -3.16365 |
| H | 1.96758  | -8.91416 | -4.0322  |
| C | -0.05575 | -6.18512 | -0.69736 |
| C | 0.73961  | -5.61225 | 0.47071  |
| C | 0.32832  | -4.70222 | 1.4249   |

|   |          |          |          |
|---|----------|----------|----------|
| C | 2.06117  | -6.07735 | 0.44435  |
| C | 1.25231  | -4.25006 | 2.37991  |
| H | -0.68104 | -4.30437 | 1.42479  |
| C | 2.96895  | -5.66847 | 1.41428  |
| C | 2.55991  | -4.75864 | 2.37857  |
| H | 3.99323  | -6.0286  | 1.40626  |
| H | 3.26144  | -4.40247 | 3.12508  |
| C | -0.77092 | -5.1298  | -1.53206 |
| C | -0.25912 | -3.95602 | -2.04499 |
| C | -2.12818 | -5.44688 | -1.67776 |
| C | -1.11984 | -3.07161 | -2.71611 |
| H | 0.77952  | -3.68162 | -1.89418 |
| C | -2.97298 | -4.60425 | -2.39176 |
| C | -2.46595 | -3.42003 | -2.90731 |
| H | -4.02417 | -4.84519 | -2.51741 |
| H | -3.11723 | -2.72932 | -3.43164 |
| C | -1.21912 | -7.09625 | -0.309   |
| C | -2.40406 | -6.67655 | -0.92542 |
| C | -1.20114 | -8.22252 | 0.49527  |
| C | -3.58489 | -7.38648 | -0.74098 |
| C | -2.3859  | -8.93074 | 0.68394  |
| H | -0.28103 | -8.54827 | 0.97125  |
| C | -3.56644 | -8.51724 | 0.06865  |
| H | -4.50742 | -7.06493 | -1.2153  |
| H | -2.38922 | -9.81352 | 1.31567  |
| H | -4.48048 | -9.0817  | 0.22483  |
| C | -0.64457 | -1.77656 | -3.07873 |
| C | -0.23124 | -0.64394 | -3.2039  |
| C | 0.89096  | -3.21156 | 3.29555  |
| C | 0.60993  | -2.2735  | 4.00187  |

**(P<sub>2</sub>)-DEAbp**

|   |          |          |          |
|---|----------|----------|----------|
| C | 0.06489  | 2.7052   | 2.21696  |
| C | 0.11007  | 0.75604  | 3.42987  |
| C | 0.54732  | 1.4299   | 4.57329  |
| C | 0.73525  | 2.8033   | 4.50787  |
| C | 0.49037  | 3.46173  | 3.31351  |
| H | 0.75937  | 0.8866   | 5.48729  |
| H | 1.08012  | 3.35286  | 5.37818  |
| H | 0.62802  | 4.5322   | 3.21397  |
| C | -0.11007 | -0.75604 | 3.42987  |
| C | -0.54732 | -1.4299  | 4.57329  |
| C | -0.73525 | -2.8033  | 4.50787  |
| H | -0.75937 | -0.8866  | 5.48729  |
| C | -0.06489 | -2.7052  | 2.21696  |
| C | -0.49037 | -3.46173 | 3.31351  |
| H | -1.08012 | -3.35286 | 5.37818  |
| H | -0.62802 | -4.5322  | 3.21397  |
| N | -0.1244  | 1.38283  | 2.27844  |
| N | 0.1244   | -1.38283 | 2.27844  |
| C | -0.19036 | 3.32265  | 0.94423  |
| C | -0.40531 | 3.76642  | -0.15767 |
| C | 0.19036  | -3.32265 | 0.94423  |
| C | 0.40531  | -3.76642 | -0.15767 |



|   |          |          |          |
|---|----------|----------|----------|
| C | -0.72567 | 4.18099  | -1.49395 |
| C | 0.72567  | -4.18099 | -1.49395 |
| C | 0.01563  | 3.73733  | -2.48202 |
| C | -0.01563 | -3.73733 | -2.48202 |
| C | 0.74234  | 3.17149  | -3.41963 |
| C | -0.74234 | -3.17149 | -3.41963 |
| C | 0.41104  | 1.8242   | -3.77349 |
| C | 0.14837  | 0.64909  | -3.90891 |
| C | -0.41104 | -1.8242  | -3.77349 |
| C | -0.14837 | -0.64909 | -3.90891 |
| C | -1.95083 | 5.04436  | -1.69978 |
| H | -2.8368  | 4.54493  | -1.29609 |
| H | -1.83969 | 5.99825  | -1.17445 |
| H | -2.10965 | 5.24338  | -2.76116 |
| C | 1.94116  | 3.82733  | -4.06614 |
| H | 2.83908  | 3.22438  | -3.90029 |
| H | 1.79409  | 3.91226  | -5.14742 |
| H | 2.10417  | 4.82484  | -3.65397 |
| C | -1.94116 | -3.82733 | -4.06614 |
| H | -2.83908 | -3.22438 | -3.90029 |
| H | -1.79409 | -3.91226 | -5.14742 |
| H | -2.10417 | -4.82484 | -3.65397 |
| C | 1.95083  | -5.04436 | -1.69978 |
| H | 2.8368   | -4.54493 | -1.29609 |
| H | 1.83969  | -5.99825 | -1.17445 |
| H | 2.10965  | -5.24338 | -2.76116 |

**(P<sub>2</sub>)-DESbp**

|   |          |          |          |
|---|----------|----------|----------|
| C | 0.10236  | 2.73352  | 5.1255   |
| C | 0.16292  | 0.72897  | 6.23338  |
| C | 0.78207  | 1.30874  | 7.34245  |
| C | 1.07499  | 2.66456  | 7.30997  |
| C | 0.73089  | 3.39632  | 6.18581  |
| H | 1.04701  | 0.69979  | 8.19989  |
| H | 1.56845  | 3.14351  | 8.14994  |
| H | 0.93249  | 4.45873  | 6.1135   |
| C | -0.16292 | -0.72897 | 6.23338  |
| C | -0.78207 | -1.30874 | 7.34245  |
| C | -1.07499 | -2.66456 | 7.30997  |
| H | -1.04701 | -0.69979 | 8.19989  |
| C | -0.10236 | -2.73352 | 5.1255   |
| C | -0.73089 | -3.39632 | 6.18581  |
| H | -1.56845 | -3.14351 | 8.14994  |
| H | -0.93249 | -4.45873 | 6.1135   |
| N | -0.16891 | 1.42319  | 5.14546  |
| N | 0.16891  | -1.42319 | 5.14546  |
| C | 3.41868  | 8.91282  | -1.08745 |
| C | 3.47705  | 7.67997  | -1.72873 |
| C | 2.32101  | 6.91202  | -1.80858 |
| C | 1.1208   | 7.37506  | -1.2545  |
| C | 1.06373  | 8.60265  | -0.61753 |
| C | 2.22342  | 9.37016  | -0.53474 |
| H | 4.31285  | 9.5242   | -1.01519 |
| H | 4.41087  | 7.32585  | -2.15538 |

|   |          |          |          |
|---|----------|----------|----------|
| H | 0.13209  | 8.96105  | -0.18992 |
| H | 2.19573  | 10.33381 | -0.03572 |
| C | -0.00674 | 6.37592  | -1.49472 |
| C | 0.73944  | 5.24821  | -2.1983  |
| C | 0.25344  | 4.01652  | -2.58318 |
| C | 2.08539  | 5.58495  | -2.39045 |
| C | 1.12996  | 3.09094  | -3.17206 |
| H | -0.78034 | 3.73897  | -2.40657 |
| C | 2.95013  | 4.68843  | -3.00916 |
| C | 2.46955  | 3.44576  | -3.39674 |
| H | 3.99404  | 4.94089  | -3.1684  |
| H | 3.13403  | 2.7215   | -3.85507 |
| C | -0.75062 | 5.91789  | -0.24447 |
| C | -0.24974 | 5.24798  | 0.85527  |
| C | -2.11507 | 6.21905  | -0.34368 |
| C | -1.1293  | 4.8654   | 1.8789   |
| H | 0.80313  | 4.99612  | 0.92837  |
| C | -2.9891  | 5.85985  | 0.67569  |
| C | -2.49277 | 5.18364  | 1.78021  |
| H | -4.04844 | 6.08811  | 0.6079   |
| H | -3.15937 | 4.87892  | 2.57951  |
| C | -1.14493 | 6.96993  | -2.32148 |
| C | -2.35857 | 6.88169  | -1.63052 |
| C | -1.08682 | 7.54636  | -3.57863 |
| C | -3.52963 | 7.37266  | -2.1963  |
| C | -2.26062 | 8.03679  | -4.14613 |
| H | -0.14409 | 7.61497  | -4.11327 |
| C | -3.47096 | 7.95118  | -3.45974 |
| H | -4.47464 | 7.3061   | -1.66527 |
| H | -2.2324  | 8.48982  | -5.1322  |
| H | -4.37638 | 8.33876  | -3.91638 |
| C | -0.65931 | 4.12795  | 3.01182  |
| C | -0.30295 | 3.47563  | 3.96317  |
| C | 0.6658   | 1.77137  | -3.44771 |
| C | 0.23746  | 0.64154  | -3.54135 |
| C | 3.47096  | -7.95118 | -3.45974 |
| C | 3.52963  | -7.37266 | -2.1963  |
| C | 2.35857  | -6.88169 | -1.63052 |
| C | 1.14493  | -6.96993 | -2.32148 |
| C | 1.08682  | -7.54636 | -3.57863 |
| C | 2.26062  | -8.03679 | -4.14613 |
| H | 4.37638  | -8.33876 | -3.91638 |
| H | 4.47464  | -7.3061  | -1.66527 |
| H | 0.14409  | -7.61497 | -4.11327 |
| H | 2.2324   | -8.48982 | -5.1322  |
| C | 0.00674  | -6.37592 | -1.49472 |
| C | 0.75062  | -5.91789 | -0.24447 |
| C | 0.24974  | -5.24798 | 0.85527  |
| C | 2.11507  | -6.21905 | -0.34368 |
| C | 1.1293   | -4.8654  | 1.8789   |
| H | -0.80313 | -4.99612 | 0.92837  |
| C | 2.9891   | -5.85985 | 0.67569  |
| C | 2.49277  | -5.18364 | 1.78021  |
| H | 4.04844  | -6.08811 | 0.6079   |
| H | 3.15937  | -4.87892 | 2.57951  |
| C | -0.73944 | -5.24821 | -2.1983  |

|   |          |           |          |
|---|----------|-----------|----------|
| C | -0.25344 | -4.01652  | -2.58318 |
| C | -2.08539 | -5.58495  | -2.39045 |
| C | -1.12996 | -3.09094  | -3.17206 |
| H | 0.78034  | -3.73897  | -2.40657 |
| C | -2.95013 | -4.68843  | -3.00916 |
| C | -2.46955 | -3.44576  | -3.39674 |
| H | -3.99404 | -4.94089  | -3.1684  |
| H | -3.13403 | -2.7215   | -3.85507 |
| C | -1.1208  | -7.37506  | -1.2545  |
| C | -2.32101 | -6.91202  | -1.80858 |
| C | -1.06373 | -8.60265  | -0.61753 |
| C | -3.47705 | -7.67997  | -1.72873 |
| C | -2.22342 | -9.37016  | -0.53474 |
| H | -0.13209 | -8.96105  | -0.18992 |
| C | -3.41868 | -8.91282  | -1.08745 |
| H | -4.41087 | -7.32585  | -2.15538 |
| H | -2.19573 | -10.33381 | -0.03572 |
| H | -4.31285 | -9.5242   | -1.01519 |
| C | -0.6658  | -1.77137  | -3.44771 |
| C | -0.23746 | -0.64154  | -3.54135 |
| C | 0.65931  | -4.12795  | 3.01182  |
| C | 0.30295  | -3.47563  | 3.96317  |

**(P)-DEA**

|   |          |          |          |
|---|----------|----------|----------|
| C | -4.61525 | -1.496   | -0.02125 |
| H | -5.68525 | -1.496   | -0.02125 |
| C | -3.41405 | -1.496   | -0.02125 |
| C | -1.87405 | -1.496   | -0.02125 |
| C | -1.1918  | -2.53359 | 0.52144  |
| C | -0.50956 | -3.57118 | 1.06414  |
| C | -0.10899 | -4.77011 | 0.18453  |
| C | 0.20346  | -5.70528 | -0.50157 |
| H | 0.48177  | -6.5383  | -1.11273 |
| C | -0.13348 | -3.55545 | 2.55743  |
| H | -0.91423 | -4.01504 | 3.12672  |
| H | 0.77853  | -4.09624 | 2.70126  |
| H | -0.00343 | -2.54414 | 2.88184  |
| C | -1.10669 | -0.31286 | -0.64008 |
| H | -0.7762  | -0.57701 | -1.62288 |
| H | -1.75117 | 0.53933  | -0.69753 |
| H | -0.25952 | -0.07887 | -0.02978 |

**(P)-DES**

|   |         |         |          |
|---|---------|---------|----------|
| C | 7.89872 | 2.90281 | 2.11261  |
| C | 8.06339 | 4.23632 | 2.45603  |
| C | 7.87529 | 5.21239 | 1.48362  |
| C | 7.51976 | 4.8498  | 0.17809  |
| C | 7.35495 | 3.52512 | -0.17165 |
| C | 7.54764 | 2.53335 | 0.80367  |
| H | 8.04289 | 2.12519 | 2.85464  |
| H | 8.33735 | 4.50666 | 3.47126  |

|   |          |          |          |
|---|----------|----------|----------|
| H | 7.08294  | 3.23953  | -1.18243 |
| C | 7.37016  | 6.08621  | -0.70337 |
| C | 7.70045  | 7.20041  | 0.28433  |
| C | 7.73583  | 8.56642  | 0.0625   |
| C | 7.98732  | 6.67422  | 1.54966  |
| C | 8.0619   | 9.40968  | 1.12225  |
| H | 7.51332  | 8.97391  | -0.91916 |
| C | 8.31263  | 7.51604  | 2.60705  |
| C | 8.3475   | 8.88819  | 2.38321  |
| H | 8.09326  | 10.48322 | 0.96462  |
| H | 8.53549  | 7.11341  | 3.59074  |
| H | 8.59909  | 9.55985  | 3.1981   |
| C | 8.26421  | 6.06659  | -1.93868 |
| C | 9.64326  | 5.96433  | -2.00266 |
| C | 7.49975  | 6.16686  | -3.10741 |
| C | 10.25824 | 5.96265  | -3.25259 |
| H | 10.23527 | 5.88664  | -1.09564 |
| C | 8.1138   | 6.16488  | -4.35464 |
| C | 9.49929  | 6.06178  | -4.4178  |
| H | 11.3387  | 5.88276  | -3.3198  |
| H | 7.52593  | 6.24181  | -5.26451 |
| H | 9.99478  | 6.05817  | -5.3837  |
| C | 5.98801  | 6.22159  | -1.33538 |
| C | 6.08419  | 6.26398  | -2.73228 |
| C | 4.76354  | 6.30413  | -0.7046  |
| C | 4.93831  | 6.38566  | -3.51073 |
| C | 3.60216  | 6.43181  | -1.48378 |
| H | 4.68437  | 6.275    | 0.37711  |
| C | 3.70383  | 6.46889  | -2.88426 |
| H | 5.00148  | 6.41745  | -4.59416 |
| C | 2.32614  | 6.53179  | -0.85675 |
| H | 2.79772  | 6.56621  | -3.47211 |
| C | 7.39686  | 1.15652  | 0.46649  |
| C | 1.25583  | 6.6255   | -0.31958 |
| H | 0.30243  | 6.70898  | 0.15892  |
| C | 7.27912  | -0.00254 | 0.17391  |
| H | 7.17424  | -1.035   | -0.08672 |

# M062X/6-31G\* XYZ geometries ( Å ):

## (P<sub>4</sub>)-DEA

|   |          |          |          |
|---|----------|----------|----------|
| C | -0.66932 | 4.91488  | 0.144    |
| C | 0.66932  | 4.91488  | -0.144   |
| C | -1.8539  | 4.87186  | 0.39296  |
| C | 1.8539   | 4.87186  | -0.39296 |
| C | -3.2418  | 4.78599  | 0.72895  |
| C | -4.03105 | 4.03105  | 0.       |
| C | 3.2418   | 4.78599  | -0.72895 |
| C | 4.03105  | 4.03105  | 0.       |
| C | -4.78599 | 3.2418   | -0.72895 |
| C | 4.78599  | 3.2418   | 0.72895  |
| C | -4.87186 | 1.8539   | -0.39296 |
| C | -4.91488 | 0.66932  | -0.144   |
| C | 4.87186  | 1.8539   | 0.39296  |
| C | 4.91488  | 0.66932  | 0.144    |
| C | -4.91488 | -0.66932 | 0.144    |
| C | -4.87186 | -1.8539  | 0.39296  |
| C | -4.78599 | -3.2418  | 0.72895  |
| C | -4.03105 | -4.03105 | 0.       |
| C | -3.2418  | -4.78599 | -0.72895 |
| C | -1.8539  | -4.87186 | -0.39296 |
| C | -0.66932 | -4.91488 | -0.144   |
| C | 0.66932  | -4.91488 | 0.144    |
| C | 1.8539   | -4.87186 | 0.39296  |
| C | 3.2418   | -4.78599 | 0.72895  |
| C | 4.03105  | -4.03105 | 0.       |
| C | 4.78599  | -3.2418  | -0.72895 |
| C | 4.87186  | -1.8539  | -0.39296 |
| C | 4.91488  | -0.66932 | -0.144   |
| C | -5.55695 | -3.72875 | 1.9383   |
| H | -5.24073 | -3.18366 | 2.8327   |
| H | -6.62849 | -3.55253 | 1.80328  |
| H | -5.39081 | -4.79562 | 2.09753  |
| C | -3.72875 | -5.55695 | -1.9383  |
| H | -3.18366 | -5.24073 | -2.8327  |
| H | -3.55253 | -6.62849 | -1.80328 |
| H | -4.79562 | -5.39081 | -2.09753 |
| C | 5.55695  | -3.72875 | -1.9383  |
| H | 5.24073  | -3.18366 | -2.8327  |
| H | 6.62849  | -3.55253 | -1.80328 |
| H | 5.39081  | -4.79562 | -2.09753 |
| C | 3.72875  | -5.55695 | 1.9383   |
| H | 3.18366  | -5.24073 | 2.8327   |
| H | 3.55253  | -6.62849 | 1.80328  |
| H | 4.79562  | -5.39081 | 2.09753  |
| C | -3.72875 | 5.55695  | 1.9383   |
| H | -3.18366 | 5.24073  | 2.8327   |
| H | -3.55253 | 6.62849  | 1.80328  |
| H | -4.79562 | 5.39081  | 2.09753  |
| C | -5.55695 | 3.72875  | -1.9383  |
| H | -5.24073 | 3.18366  | -2.8327  |

|   |          |         |          |
|---|----------|---------|----------|
| H | -6.62849 | 3.55253 | -1.80328 |
| H | -5.39081 | 4.79562 | -2.09753 |
| C | 3.72875  | 5.55695 | -1.9383  |
| H | 3.18366  | 5.24073 | -2.8327  |
| H | 3.55253  | 6.62849 | -1.80328 |
| H | 4.79562  | 5.39081 | -2.09753 |
| C | 5.55695  | 3.72875 | 1.9383   |
| H | 5.24073  | 3.18366 | 2.8327   |
| H | 6.62849  | 3.55253 | 1.80328  |
| H | 5.39081  | 4.79562 | 2.09753  |

**(P<sub>4</sub>)-DES**

**(P<sub>2</sub>)-DEAp**

|   |          |          |          |
|---|----------|----------|----------|
| C | 0.10897  | -1.19484 | 4.05269  |
| C | 0.       | 0.       | 4.75095  |
| H | 0.19496  | -2.14605 | 4.56524  |
| C | -0.10616 | 1.14632  | 2.65567  |
| C | -0.10897 | 1.19484  | 4.05269  |
| H | 0.       | 0.       | 5.83641  |
| H | -0.19496 | 2.14605  | 4.56524  |
| N | 0.       | 0.       | 1.976    |
| C | -0.22898 | 2.31121  | 1.82125  |
| C | -0.35198 | 3.11865  | 0.93092  |
| C | -0.56229 | 3.89693  | -0.2572  |
| C | 0.17952  | 3.58875  | -1.2975  |
| C | 0.90796  | 3.08762  | -2.27085 |
| C | 0.49338  | 1.8152   | -2.78478 |
| C | 0.10616  | -1.14632 | 2.65567  |
| C | 0.22898  | -2.31121 | 1.82125  |
| C | 0.35198  | -3.11865 | 0.93092  |
| C | 0.56229  | -3.89693 | -0.2572  |
| C | -0.17952 | -3.58875 | -1.2975  |
| C | -0.90796 | -3.08762 | -2.27085 |
| C | -0.49338 | -1.8152  | -2.78478 |
| C | -0.17791 | -0.6615  | -2.98418 |
| C | 0.17791  | 0.6615   | -2.98418 |
| C | -1.68492 | 4.90735  | -0.28802 |
| H | -2.63339 | 4.42962  | -0.02418 |
| H | -1.50249 | 5.70525  | 0.43889  |
| H | -1.7769  | 5.35228  | -1.28047 |
| C | 2.1992   | 3.6984   | -2.76282 |
| H | 2.42928  | 4.6114   | -2.21054 |
| H | 3.02464  | 2.99087  | -2.63926 |
| H | 2.12692  | 3.94066  | -3.8278  |
| C | 1.68492  | -4.90735 | -0.28802 |
| H | 2.63339  | -4.42962 | -0.02418 |
| H | 1.50249  | -5.70525 | 0.43889  |
| H | 1.7769   | -5.35228 | -1.28047 |
| C | -2.1992  | -3.6984  | -2.76282 |
| H | -3.02464 | -2.99087 | -2.63926 |
| H | -2.12692 | -3.94066 | -3.8278  |
| H | -2.42928 | -4.6114  | -2.21054 |

**(P<sub>2</sub>)-DESp**

|   |          |          |          |
|---|----------|----------|----------|
| C | -0.30431 | 1.15663  | 6.18103  |
| C | -0.29256 | 1.11004  | 4.7829   |
| C | 0.       | 0.       | 6.8827   |
| C | 0.30431  | -1.15663 | 6.18103  |
| H | 0.54685  | -2.08284 | 6.6889   |
| C | 0.29256  | -1.11004 | 4.7829   |
| H | 0.       | 0.       | 7.96815  |
| N | 0.       | 0.       | 4.0962   |
| H | -0.54685 | 2.08284  | 6.6889   |
| C | 3.56686  | 8.5174   | 0.06743  |
| C | 3.58495  | 7.38675  | -0.74223 |
| C | 2.40394  | 6.67688  | -0.92625 |
| C | 1.21926  | 7.09663  | -0.30935 |
| C | 1.20171  | 8.22287  | 0.49503  |
| C | 2.38654  | 8.93094  | 0.68323  |
| H | 4.48087  | 9.08198  | 0.22341  |
| H | 4.5072   | 7.06502  | -1.21696 |
| H | 0.28174  | 8.5485   | 0.97137  |
| H | 2.3904   | 9.81371  | 1.31497  |
| C | 0.05579  | 6.18546  | -0.69737 |
| C | 0.77057  | 5.13019  | -1.53225 |
| C | 0.25867  | 3.95632  | -2.04495 |
| C | 2.12779  | 5.44729  | -1.67846 |
| C | 1.11911  | 3.07188  | -2.71624 |
| H | -0.78002 | 3.68222  | -1.89389 |
| C | 2.97235  | 4.60466  | -2.39283 |
| C | 2.46521  | 3.42039  | -2.908   |
| H | 4.02342  | 4.84589  | -2.51899 |
| H | 3.11615  | 2.72964  | -3.43268 |
| C | -0.73919 | 5.61292  | 0.47098  |
| C | -0.32787 | 4.70269  | 1.42505  |
| C | -2.0606  | 6.07849  | 0.4452   |
| C | -1.25154 | 4.25088  | 2.38045  |
| H | 0.68148  | 4.30481  | 1.42449  |
| C | -2.9681  | 5.67     | 1.41562  |
| C | -2.55901 | 4.76002  | 2.37965  |
| H | -3.99214 | 6.03081  | 1.40807  |
| H | -3.26018 | 4.40419  | 3.12666  |
| C | -1.02572 | 6.96908  | -1.43985 |
| C | -2.23607 | 6.92863  | -0.73833 |
| C | -0.91659 | 7.68133  | -2.62168 |
| C | -3.35186 | 7.60562  | -1.21702 |
| C | -2.03621 | 8.35551  | -3.10371 |
| H | 0.02366  | 7.71342  | -3.16401 |
| C | -3.24232 | 8.31951  | -2.40556 |
| H | -4.29415 | 7.57652  | -0.67785 |
| H | -1.96859 | 8.91459  | -4.03172 |
| H | -4.10466 | 8.85192  | -2.79469 |
| C | -0.8905  | 3.21208  | 3.29577  |
| C | -0.6097  | 2.2736   | 4.00168  |
| C | 0.6442   | 1.77665  | -3.07842 |
| C | 0.23108  | 0.644    | -3.20421 |

|   |          |          |          |
|---|----------|----------|----------|
| C | 3.24232  | -8.31951 | -2.40556 |
| C | 3.35186  | -7.60562 | -1.21702 |
| C | 2.23607  | -6.92863 | -0.73833 |
| C | 1.02572  | -6.96908 | -1.43985 |
| C | 0.91659  | -7.68133 | -2.62168 |
| C | 2.03621  | -8.35551 | -3.10371 |
| H | 4.10466  | -8.85192 | -2.79469 |
| H | 4.29415  | -7.57652 | -0.67785 |
| H | -0.02366 | -7.71342 | -3.16401 |
| H | 1.96859  | -8.91459 | -4.03172 |
| C | -0.05579 | -6.18546 | -0.69737 |
| C | 0.73919  | -5.61292 | 0.47098  |
| C | 0.32787  | -4.70269 | 1.42505  |
| C | 2.0606   | -6.07849 | 0.4452   |
| C | 1.25154  | -4.25088 | 2.38045  |
| H | -0.68148 | -4.30481 | 1.42449  |
| C | 2.9681   | -5.67    | 1.41562  |
| C | 2.55901  | -4.76002 | 2.37965  |
| H | 3.99214  | -6.03081 | 1.40807  |
| H | 3.26018  | -4.40419 | 3.12666  |
| C | -0.77057 | -5.13019 | -1.53225 |
| C | -0.25867 | -3.95632 | -2.04495 |
| C | -2.12779 | -5.44729 | -1.67846 |
| C | -1.11911 | -3.07188 | -2.71624 |
| H | 0.78002  | -3.68222 | -1.89389 |
| C | -2.97235 | -4.60466 | -2.39283 |
| C | -2.46521 | -3.42039 | -2.908   |
| H | -4.02342 | -4.84589 | -2.51899 |
| H | -3.11615 | -2.72964 | -3.43268 |
| C | -1.21926 | -7.09663 | -0.30935 |
| C | -2.40394 | -6.67688 | -0.92625 |
| C | -1.20171 | -8.22287 | 0.49503  |
| C | -3.58495 | -7.38675 | -0.74223 |
| C | -2.38654 | -8.93094 | 0.68323  |
| H | -0.28174 | -8.5485  | 0.97137  |
| C | -3.56686 | -8.5174  | 0.06743  |
| H | -4.5072  | -7.06502 | -1.21696 |
| H | -2.3904  | -9.81371 | 1.31497  |
| H | -4.48087 | -9.08198 | 0.22341  |
| C | -0.6442  | -1.77665 | -3.07842 |
| C | -0.23108 | -0.644   | -3.20421 |
| C | 0.8905   | -3.21208 | 3.29577  |
| C | 0.6097   | -2.2736  | 4.00168  |

**(P<sub>2</sub>)-DEAbp**

|   |          |          |         |
|---|----------|----------|---------|
| C | 0.06639  | 2.69455  | 2.21567 |
| C | 0.11069  | 0.73933  | 3.41878 |
| C | 0.54951  | 1.40699  | 4.56526 |
| C | 0.73892  | 2.78048  | 4.50651 |
| C | 0.49376  | 3.44505  | 3.31559 |
| H | 0.76155  | 0.85886  | 5.47637 |
| H | 1.08514  | 3.32541  | 5.37918 |
| H | 0.63257  | 4.51584  | 3.22124 |
| C | -0.11069 | -0.73933 | 3.41878 |



|   |          |          |          |
|---|----------|----------|----------|
| C | -0.54951 | -1.40699 | 4.56526  |
| C | -0.73892 | -2.78048 | 4.50651  |
| H | -0.76155 | -0.85886 | 5.47637  |
| C | -0.06639 | -2.69455 | 2.21567  |
| C | -0.49376 | -3.44505 | 3.31559  |
| H | -1.08514 | -3.32541 | 5.37918  |
| H | -0.63257 | -4.51584 | 3.22124  |
| N | -0.12422 | 1.372    | 2.27072  |
| N | 0.12422  | -1.372   | 2.27072  |
| C | -0.18947 | 3.31878  | 0.94643  |
| C | -0.40521 | 3.76869  | -0.15283 |
| C | 0.18947  | -3.31878 | 0.94643  |
| C | 0.40521  | -3.76869 | -0.15283 |
| C | -0.72618 | 4.19005  | -1.48686 |
| C | 0.72618  | -4.19005 | -1.48686 |
| C | 0.01428  | 3.75059  | -2.47745 |
| C | -0.01428 | -3.75059 | -2.47745 |
| C | 0.74002  | 3.18858  | -3.41813 |
| C | -0.74002 | -3.18858 | -3.41813 |
| C | 0.40761  | 1.84325  | -3.77798 |
| C | 0.14825  | 0.66835  | -3.92095 |
| C | -0.40761 | -1.84325 | -3.77798 |
| C | -0.14825 | -0.66835 | -3.92095 |
| C | -1.95099 | 5.05505  | -1.68767 |
| H | -2.83691 | 4.55417  | -1.28571 |
| H | -1.83886 | 6.00635  | -1.15791 |
| H | -2.11041 | 5.25915  | -2.74799 |
| C | 1.93915  | 3.84646  | -4.06192 |
| H | 2.83652  | 3.24186  | -3.8993  |
| H | 1.79172  | 3.93674  | -5.1427  |
| H | 2.10304  | 4.84181  | -3.64492 |
| C | -1.93915 | -3.84646 | -4.06192 |
| H | -2.83652 | -3.24186 | -3.8993  |
| H | -1.79172 | -3.93674 | -5.1427  |
| H | -2.10304 | -4.84181 | -3.64492 |
| C | 1.95099  | -5.05505 | -1.68767 |
| H | 2.83691  | -4.55417 | -1.28571 |
| H | 1.83886  | -6.00635 | -1.15791 |
| H | 2.11041  | -5.25915 | -2.74799 |

**(P<sub>2</sub>)-DESbp**

|   |          |          |         |
|---|----------|----------|---------|
| C | 0.10226  | 2.7335   | 5.12554 |
| C | 0.16288  | 0.72898  | 6.23343 |
| C | 0.78187  | 1.30882  | 7.34257 |
| C | 1.07468  | 2.66465  | 7.31011 |
| C | 0.73061  | 3.39637  | 6.18591 |
| H | 1.04679  | 0.69989  | 8.20002 |
| H | 1.56801  | 3.14365  | 8.15011 |
| H | 0.93209  | 4.4588   | 6.11361 |
| C | -0.16288 | -0.72898 | 6.23343 |
| C | -0.78187 | -1.30882 | 7.34257 |
| C | -1.07468 | -2.66465 | 7.31011 |
| H | -1.04679 | -0.69989 | 8.20002 |
| C | -0.10226 | -2.7335  | 5.12554 |

|   |          |          |          |
|---|----------|----------|----------|
| C | -0.73061 | -3.39637 | 6.18591  |
| H | -1.56801 | -3.14365 | 8.15011  |
| H | -0.93209 | -4.4588  | 6.11361  |
| N | -0.16891 | 1.42316  | 5.14549  |
| N | 0.16891  | -1.42316 | 5.14549  |
| C | 3.41872  | 8.91279  | -1.0874  |
| C | 3.47706  | 7.67996  | -1.72872 |
| C | 2.32102  | 6.91203  | -1.80858 |
| C | 1.12083  | 7.37506  | -1.25448 |
| C | 1.06378  | 8.60262  | -0.61747 |
| C | 2.22348  | 9.37012  | -0.53466 |
| H | 4.31291  | 9.52415  | -1.01515 |
| H | 4.41088  | 7.32586  | -2.15539 |
| H | 0.13216  | 8.96103  | -0.18983 |
| H | 2.19578  | 10.33375 | -0.0356  |
| C | -0.00673 | 6.37594  | -1.49471 |
| C | 0.73944  | 5.24823  | -2.19832 |
| C | 0.25343  | 4.01654  | -2.58318 |
| C | 2.08538  | 5.58497  | -2.39049 |
| C | 1.12995  | 3.09096  | -3.17205 |
| H | -0.78033 | 3.73896  | -2.40653 |
| C | 2.9501   | 4.68845  | -3.00922 |
| C | 2.46952  | 3.44578  | -3.3968  |
| H | 3.99401  | 4.9409   | -3.16848 |
| H | 3.134    | 2.72152  | -3.85513 |
| C | -0.75065 | 5.91786  | -0.24448 |
| C | -0.24978 | 5.24796  | 0.85526  |
| C | -2.1151  | 6.21896  | -0.34375 |
| C | -1.12937 | 4.86532  | 1.87886  |
| H | 0.80308  | 4.99612  | 0.92842  |
| C | -2.98915 | 5.85969  | 0.67558  |
| C | -2.49284 | 5.18349  | 1.78011  |
| H | -4.0485  | 6.08788  | 0.60775  |
| H | -3.15947 | 4.87872  | 2.57936  |
| C | -1.14492 | 6.96995  | -2.32147 |
| C | -2.35859 | 6.88162  | -1.63058 |
| C | -1.08677 | 7.54643  | -3.57859 |
| C | -3.52965 | 7.37252  | -2.19641 |
| C | -2.26058 | 8.03682  | -4.14614 |
| H | -0.14403 | 7.61514  | -4.11319 |
| C | -3.47094 | 7.9511   | -3.45982 |
| H | -4.47468 | 7.3059   | -1.66544 |
| H | -2.2323  | 8.4899   | -5.13219 |
| H | -4.37638 | 8.33864  | -3.91648 |
| C | -0.65935 | 4.12787  | 3.01178  |
| C | -0.30301 | 3.47557  | 3.96315  |
| C | 0.66578  | 1.77137  | -3.44767 |
| C | 0.23746  | 0.64154  | -3.54136 |
| C | 3.47094  | -7.9511  | -3.45982 |
| C | 3.52965  | -7.37252 | -2.19641 |
| C | 2.35859  | -6.88162 | -1.63058 |
| C | 1.14492  | -6.96995 | -2.32147 |
| C | 1.08677  | -7.54643 | -3.57859 |
| C | 2.26058  | -8.03682 | -4.14614 |
| H | 4.37638  | -8.33864 | -3.91648 |
| H | 4.47468  | -7.3059  | -1.66544 |

|   |          |           |          |
|---|----------|-----------|----------|
| H | 0.14403  | -7.61514  | -4.11319 |
| H | 2.2323   | -8.4899   | -5.13219 |
| C | 0.00673  | -6.37594  | -1.49471 |
| C | 0.75065  | -5.91786  | -0.24448 |
| C | 0.24978  | -5.24796  | 0.85526  |
| C | 2.1151   | -6.21896  | -0.34375 |
| C | 1.12937  | -4.86532  | 1.87886  |
| H | -0.80308 | -4.99612  | 0.92842  |
| C | 2.98915  | -5.85969  | 0.67558  |
| C | 2.49284  | -5.18349  | 1.78011  |
| H | 4.0485   | -6.08788  | 0.60775  |
| H | 3.15947  | -4.87872  | 2.57936  |
| C | -0.73944 | -5.24823  | -2.19832 |
| C | -0.25343 | -4.01654  | -2.58318 |
| C | -2.08538 | -5.58497  | -2.39049 |
| C | -1.12995 | -3.09096  | -3.17205 |
| H | 0.78033  | -3.73896  | -2.40653 |
| C | -2.9501  | -4.68845  | -3.00922 |
| C | -2.46952 | -3.44578  | -3.3968  |
| H | -3.99401 | -4.9409   | -3.16848 |
| H | -3.134   | -2.72152  | -3.85513 |
| C | -1.12083 | -7.37506  | -1.25448 |
| C | -2.32102 | -6.91203  | -1.80858 |
| C | -1.06378 | -8.60262  | -0.61747 |
| C | -3.47706 | -7.67996  | -1.72872 |
| C | -2.22348 | -9.37012  | -0.53466 |
| H | -0.13216 | -8.96103  | -0.18983 |
| C | -3.41872 | -8.91279  | -1.0874  |
| H | -4.41088 | -7.32586  | -2.15539 |
| H | -2.19578 | -10.33375 | -0.0356  |
| H | -4.31291 | -9.52415  | -1.01515 |
| C | -0.66578 | -1.77137  | -3.44767 |
| C | -0.23746 | -0.64154  | -3.54136 |
| C | 0.65935  | -4.12787  | 3.01178  |
| C | 0.30301  | -3.47557  | 3.96315  |

**(P)-DEA**

|   |          |          |          |
|---|----------|----------|----------|
| C | 0.93918  | 2.9771   | 1.32409  |
| H | 1.43782  | 3.66784  | 1.96529  |
| C | 0.38392  | 2.18451  | 0.60826  |
| C | -0.30396 | 1.27601  | -0.26487 |
| C | 0.       | 0.       | -0.26376 |
| C | 0.30396  | -1.27601 | -0.26487 |
| C | -0.38392 | -2.18451 | 0.60826  |
| C | -0.93918 | -2.9771  | 1.32409  |
| H | -1.43782 | -3.66784 | 1.96529  |
| C | 1.37318  | -1.85553 | -1.16751 |
| H | 2.15503  | -2.33331 | -0.56926 |
| H | 0.9446   | -2.62006 | -1.8229  |
| H | 1.82614  | -1.07532 | -1.78167 |
| C | -1.37318 | 1.85553  | -1.16751 |
| H | -2.15503 | 2.33331  | -0.56926 |
| H | -0.9446  | 2.62006  | -1.8229  |
| H | -1.82614 | 1.07532  | -1.78167 |

**(P)-DES**

|   |          |          |          |
|---|----------|----------|----------|
| C | -0.33144 | 3.70636  | 1.61445  |
| C | -1.25324 | 3.31114  | 0.65559  |
| C | -1.07643 | 2.09177  | 0.0118   |
| C | 0.01759  | 1.27744  | 0.33004  |
| C | 0.93826  | 1.66523  | 1.2831   |
| C | 0.76616  | 2.89419  | 1.93641  |
| H | -0.45031 | 4.65364  | 2.12898  |
| H | -2.09806 | 3.95006  | 0.41702  |
| H | 1.78752  | 1.03759  | 1.53239  |
| C | 0.       | 0.       | -0.50363 |
| C | -1.26065 | 0.20362  | -1.338   |
| C | -1.80638 | -0.63629 | -2.29356 |
| C | -1.87183 | 1.42374  | -1.02575 |
| C | -2.97662 | -0.24542 | -2.94021 |
| H | -1.33162 | -1.58266 | -2.53485 |
| C | -3.03952 | 1.81367  | -1.67138 |
| C | -3.58713 | 0.96918  | -2.63129 |
| H | -3.41749 | -0.89306 | -3.69156 |
| H | -3.51825 | 2.7589   | -1.43302 |
| H | -4.49893 | 1.25828  | -3.14464 |
| C | 1.26065  | -0.20362 | -1.338   |
| C | 1.80638  | 0.63629  | -2.29356 |
| C | 1.87183  | -1.42374 | -1.02575 |
| C | 2.97662  | 0.24542  | -2.94021 |
| H | 1.33162  | 1.58266  | -2.53485 |
| C | 3.03952  | -1.81367 | -1.67138 |
| C | 3.58713  | -0.96918 | -2.63129 |
| H | 3.41749  | 0.89306  | -3.69156 |
| H | 3.51825  | -2.7589  | -1.43302 |
| H | 4.49893  | -1.25828 | -3.14464 |
| C | -0.01759 | -1.27744 | 0.33004  |
| C | 1.07643  | -2.09177 | 0.0118   |
| C | -0.93826 | -1.66523 | 1.2831   |
| C | 1.25324  | -3.31114 | 0.65559  |
| C | -0.76616 | -2.89419 | 1.93641  |
| H | -1.78752 | -1.03759 | 1.53239  |
| C | 0.33144  | -3.70636 | 1.61445  |
| H | 2.09806  | -3.95006 | 0.41702  |
| C | -1.70662 | -3.31995 | 2.92864  |
| H | 0.45031  | -4.65364 | 2.12898  |
| C | 1.70662  | 3.31995  | 2.92864  |
| C | -2.49737 | -3.67843 | 3.76262  |
| H | -3.19789 | -3.99424 | 4.50183  |
| C | 2.49737  | 3.67843  | 3.76262  |
| H | 3.19789  | 3.99424  | 4.50183  |

## CAMB3LYP ECD and UV

(*P*<sub>4</sub>)-DEA-ECD

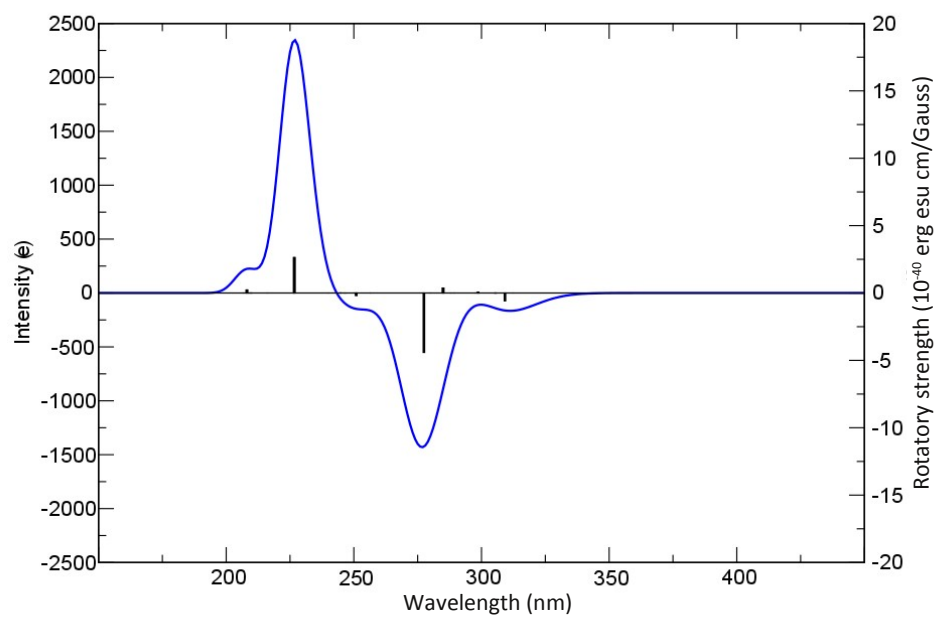

(*P*<sub>4</sub>)-DEA-UV

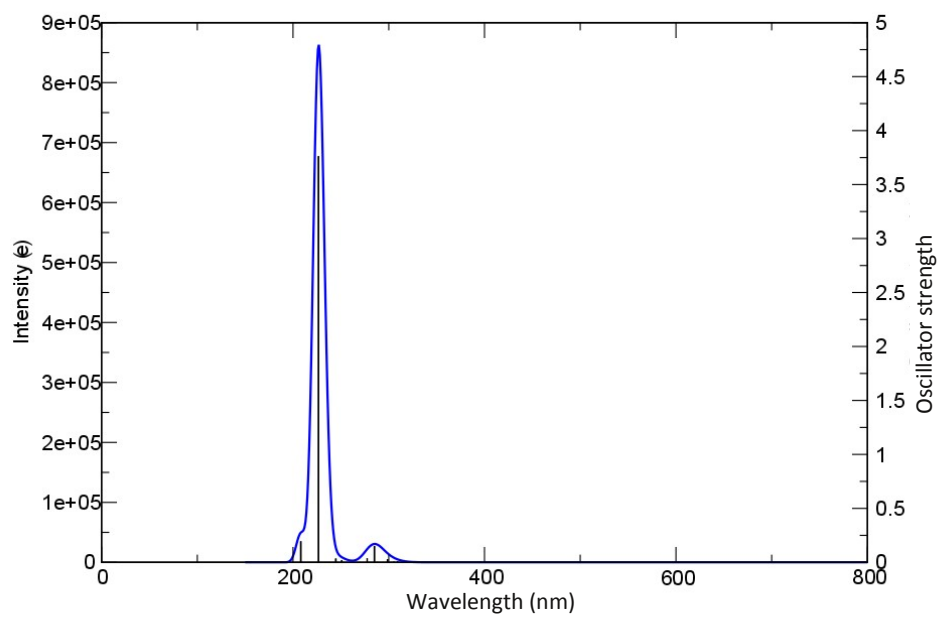

**$(P_4)$ -DES-ECD**

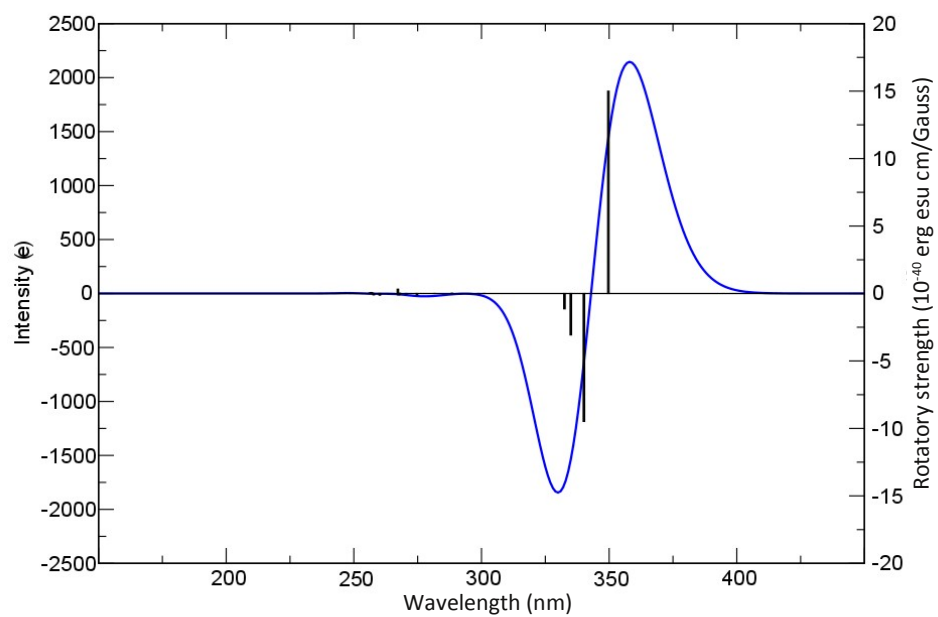

**$(P_4)$ -DES-UV**

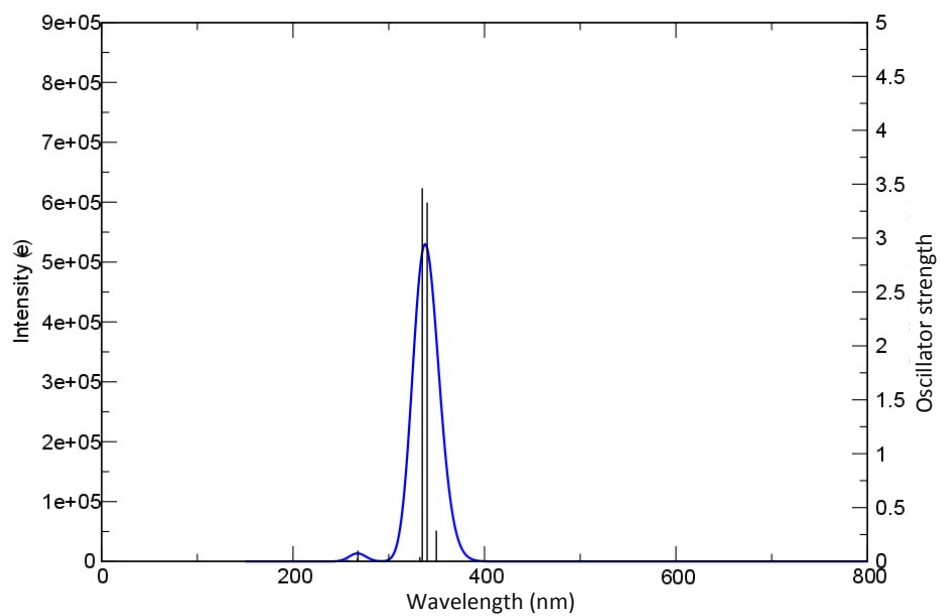

**$(P_2)$ -DEAp-ECD**

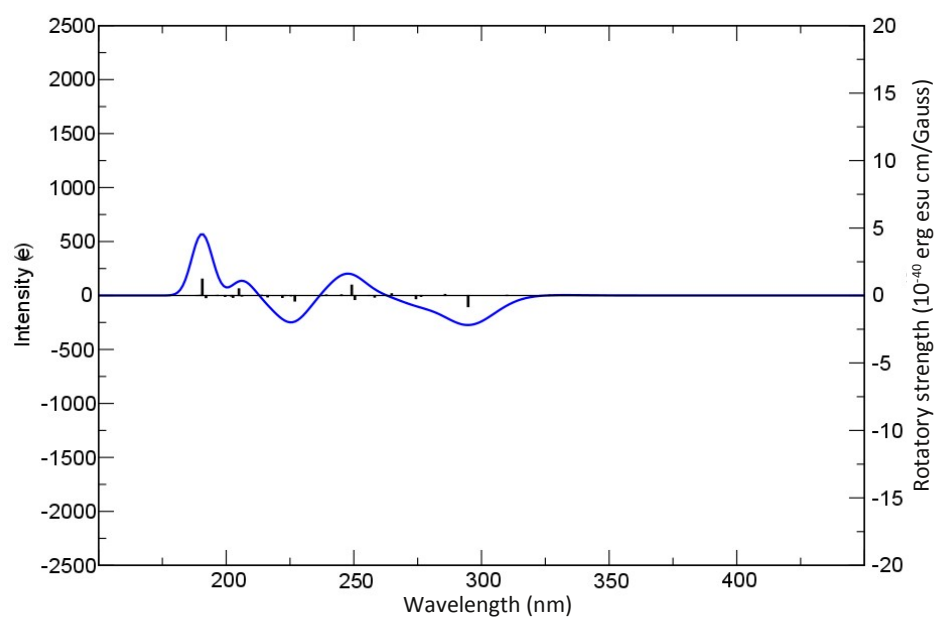

**$(P_2)$ -DEAp-UV**

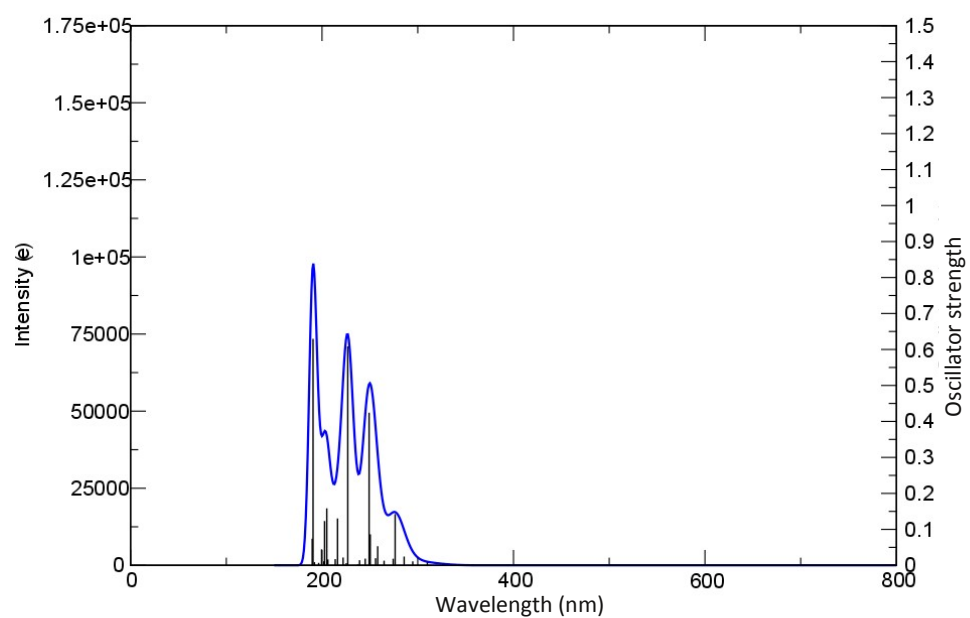

**$(P_2)$ -DESp-ECD**

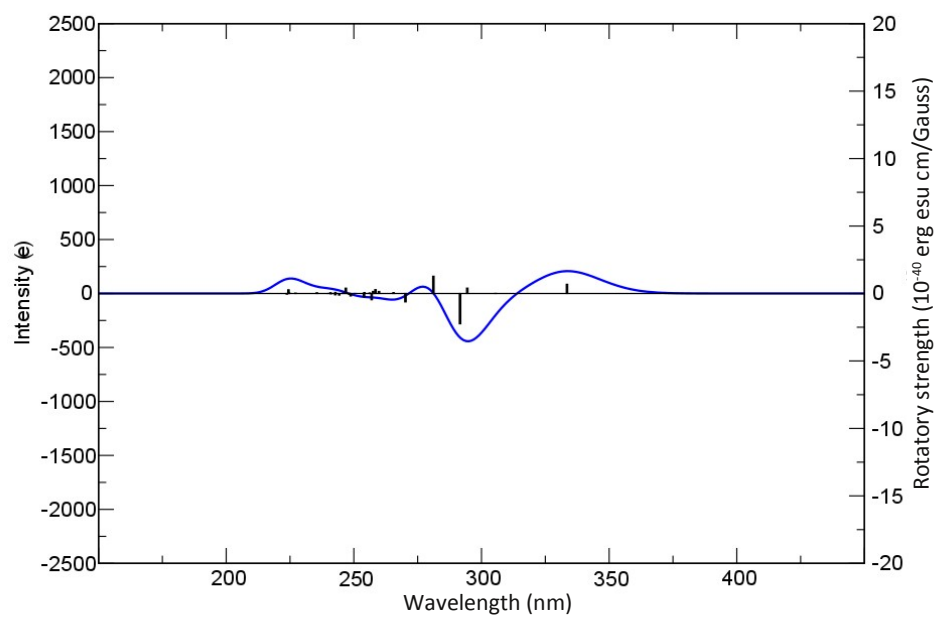

**$(P_2)$ -DESp-UV**

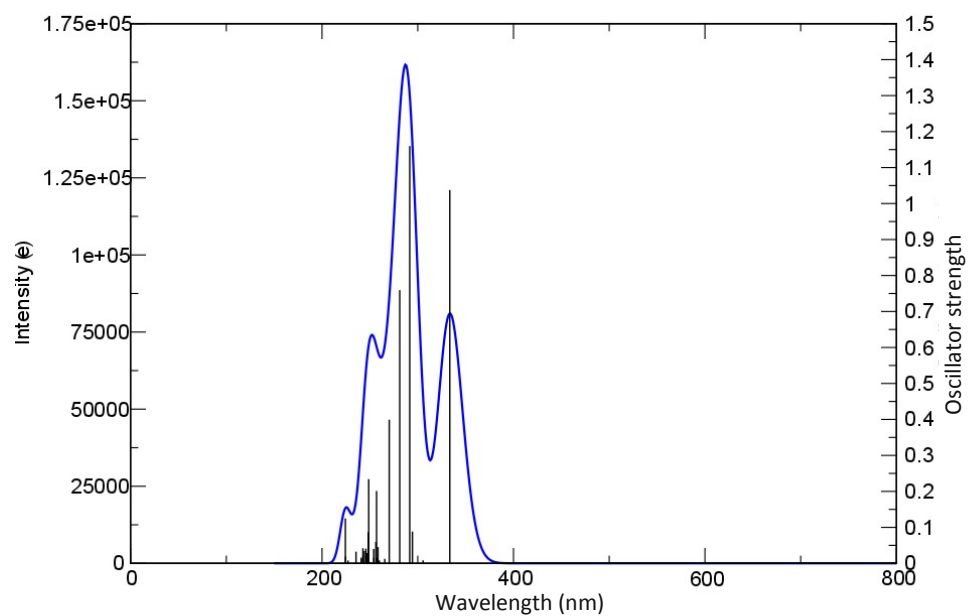



**(P<sub>2</sub>)-DEAbp-ECD**

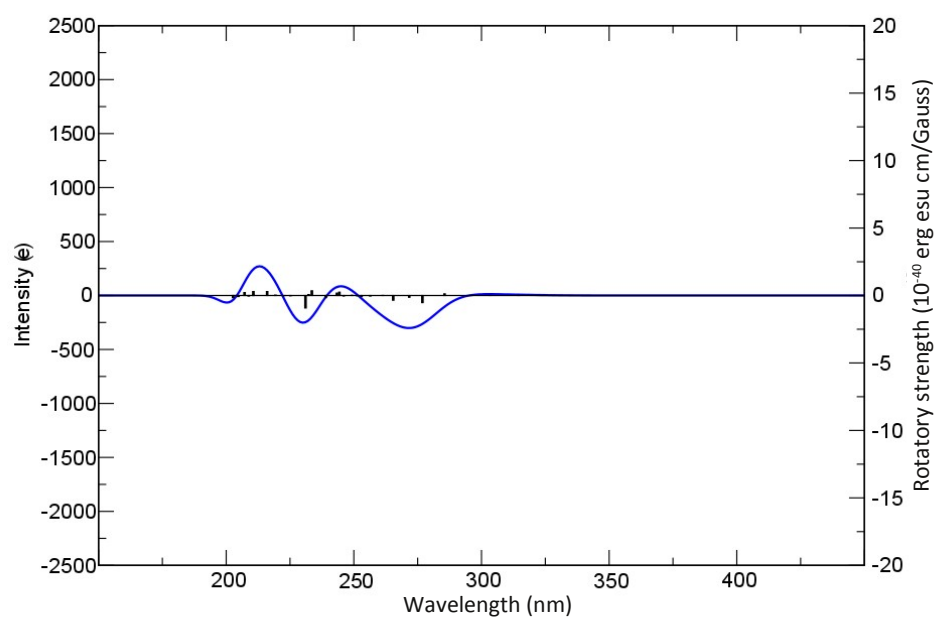

**(P<sub>2</sub>)-DEAbp-UV**

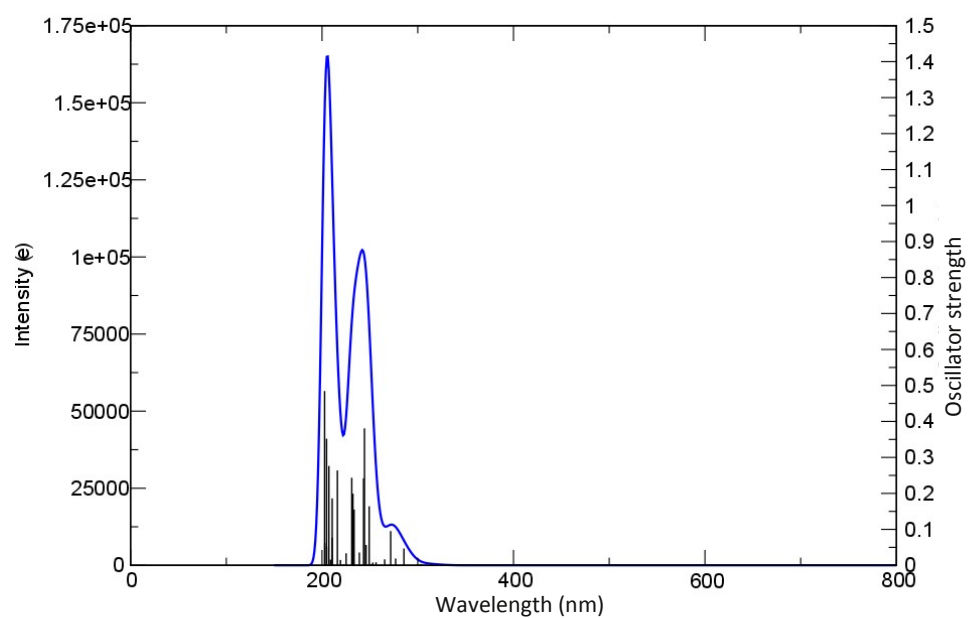

**(P<sub>2</sub>)-DESbp-ECD**

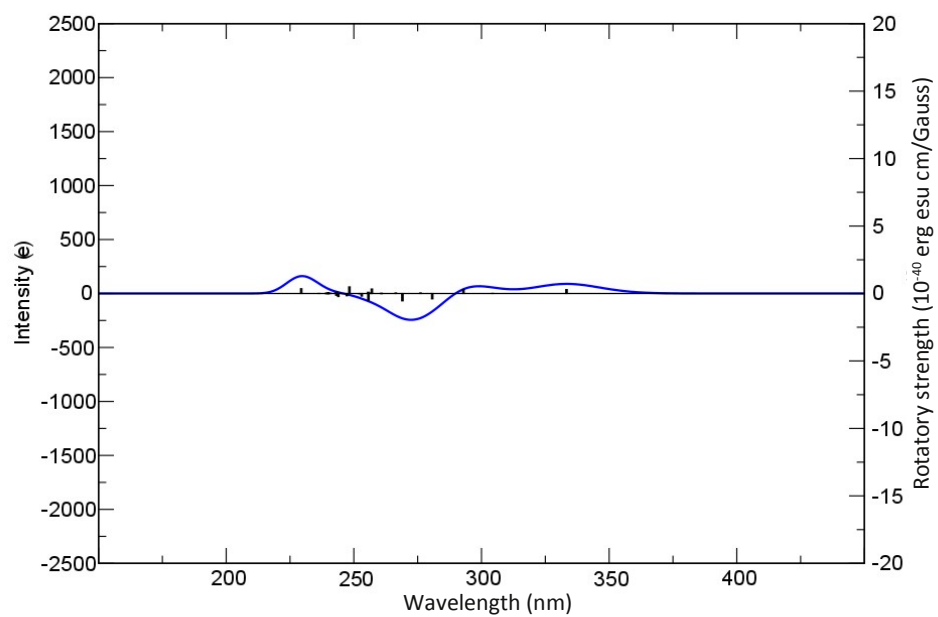

**(P<sub>2</sub>)-DESbp-UV**

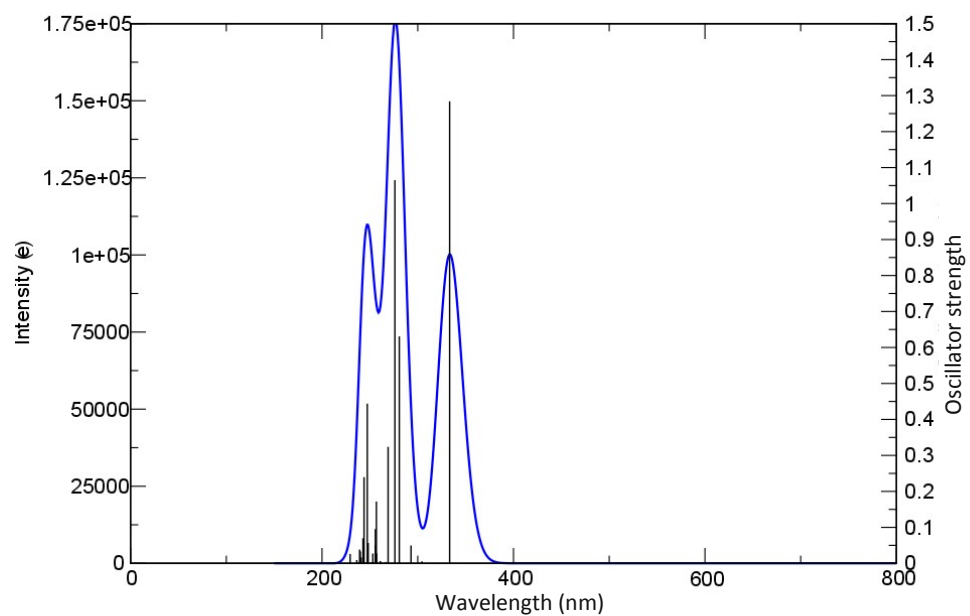

**(P)-DEA-ECD**

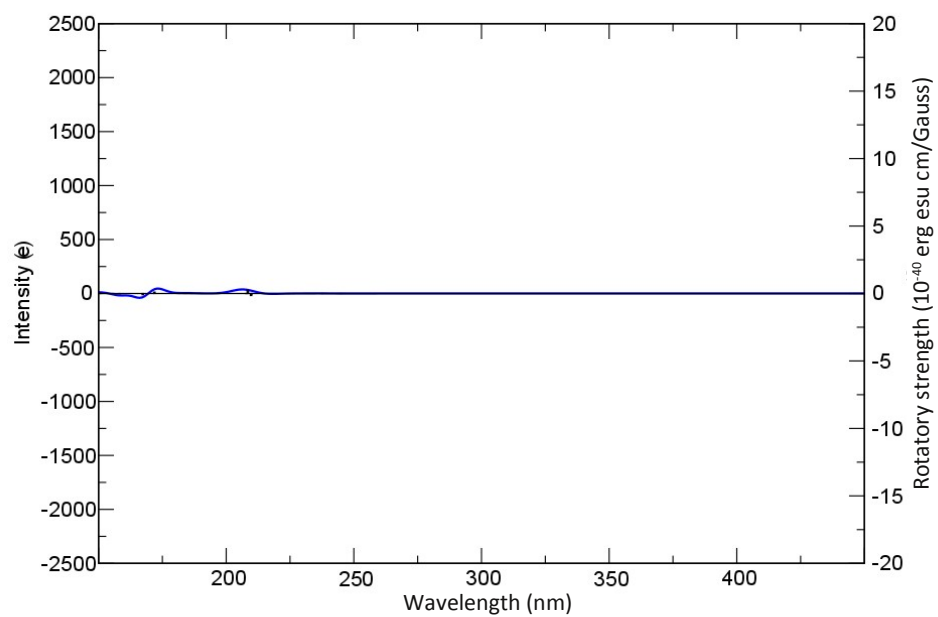

**(P)-DEA-UV**

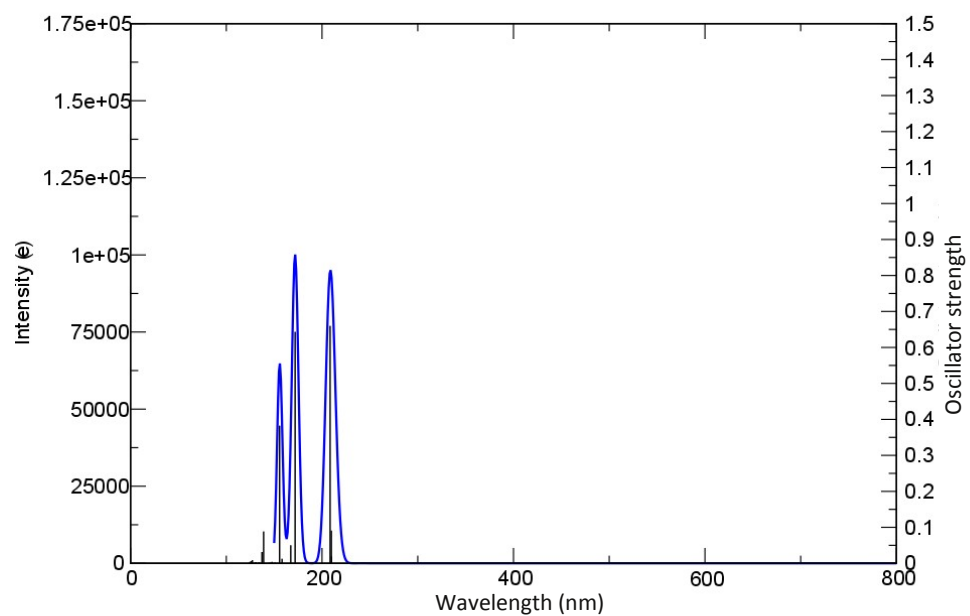

**(P)-DES-ECD**

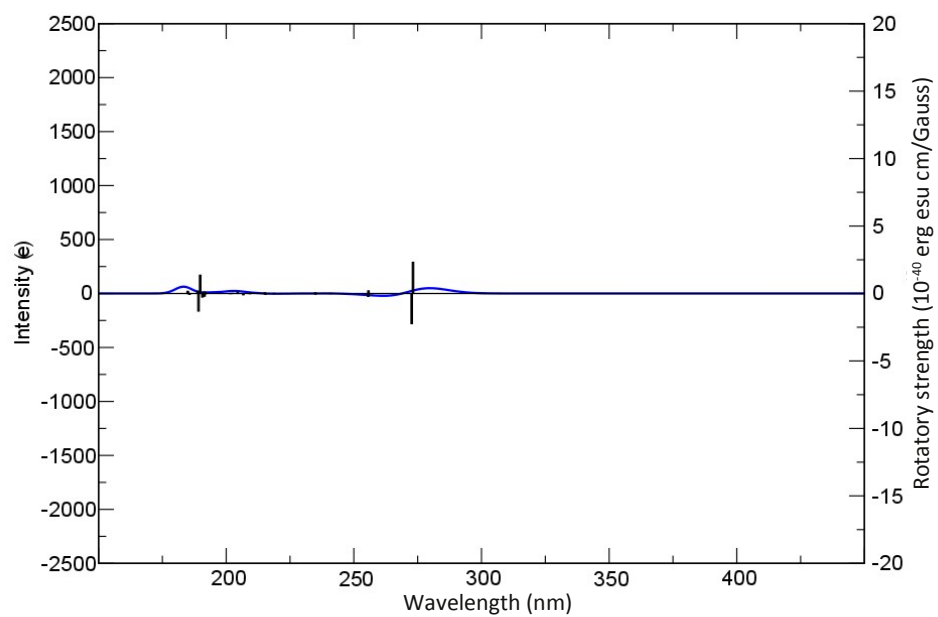

**(P)-DES-UV**

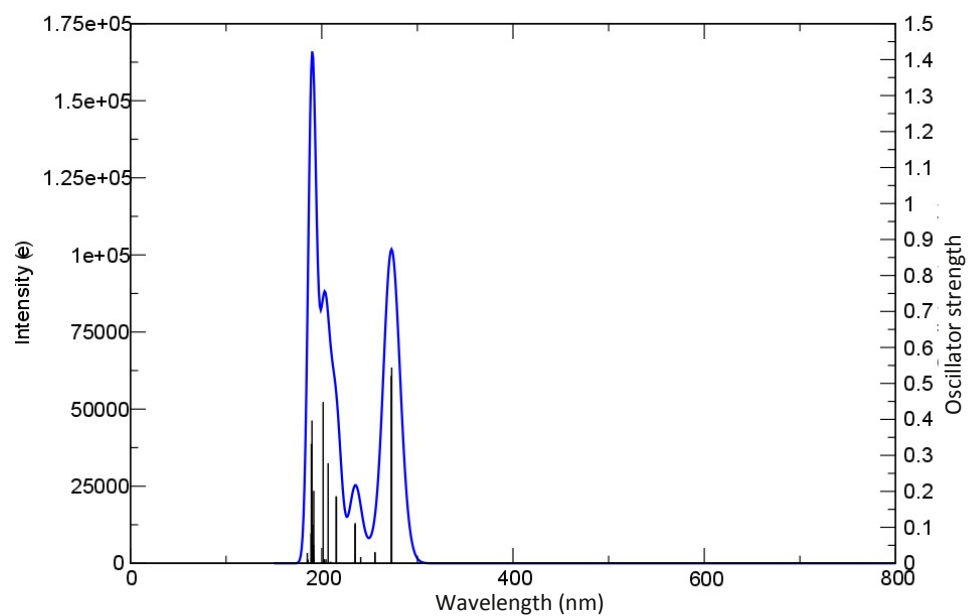

## M062X ECD and UV

### $(P_4)$ -DEA-ECD

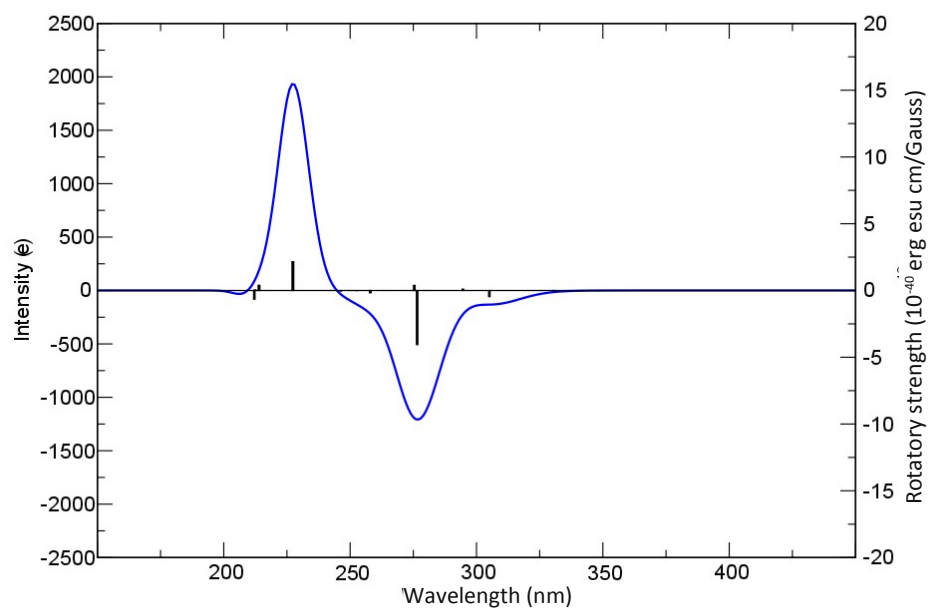

### $(P_4)$ -DEA-UV

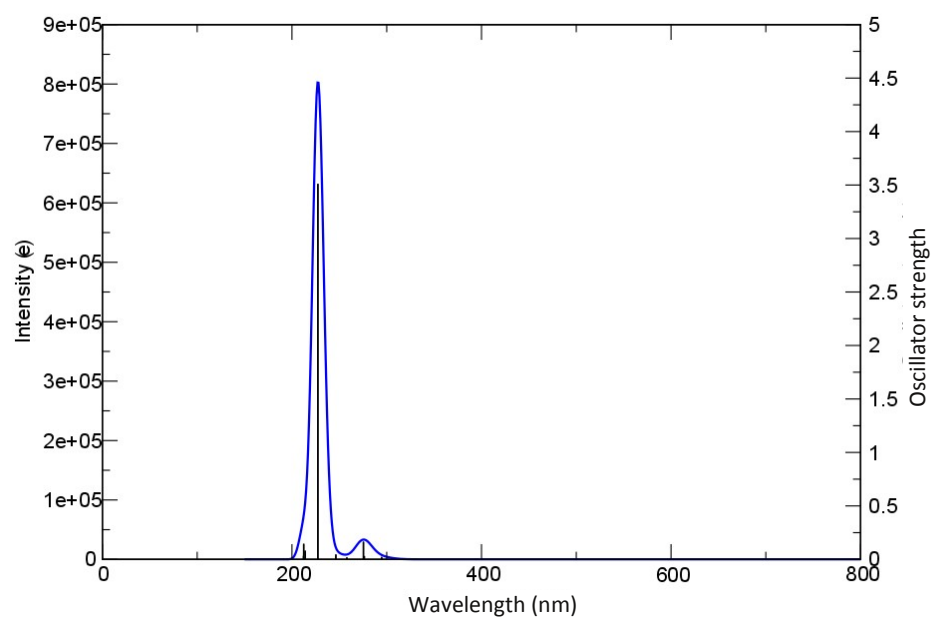

**$(P_4)$ -DES-ECD**

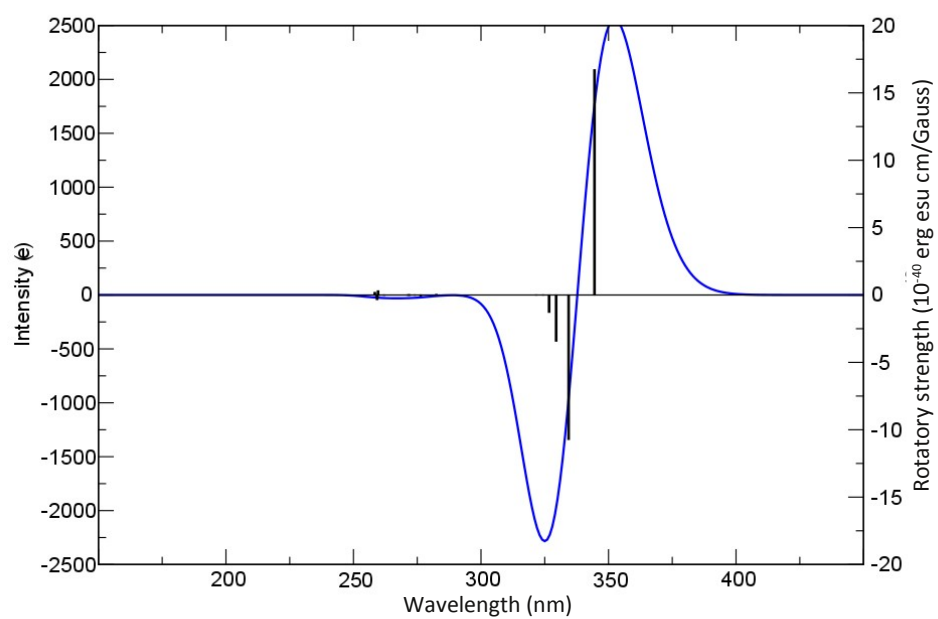

**$(P_4)$ -DES-UV**

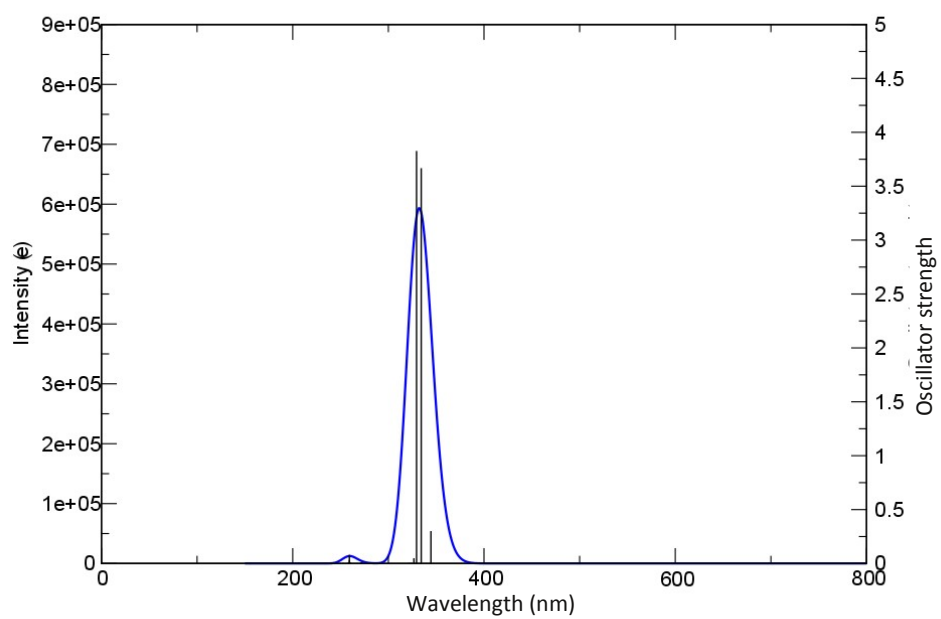

**(P<sub>2</sub>)-DEAp-ECD**

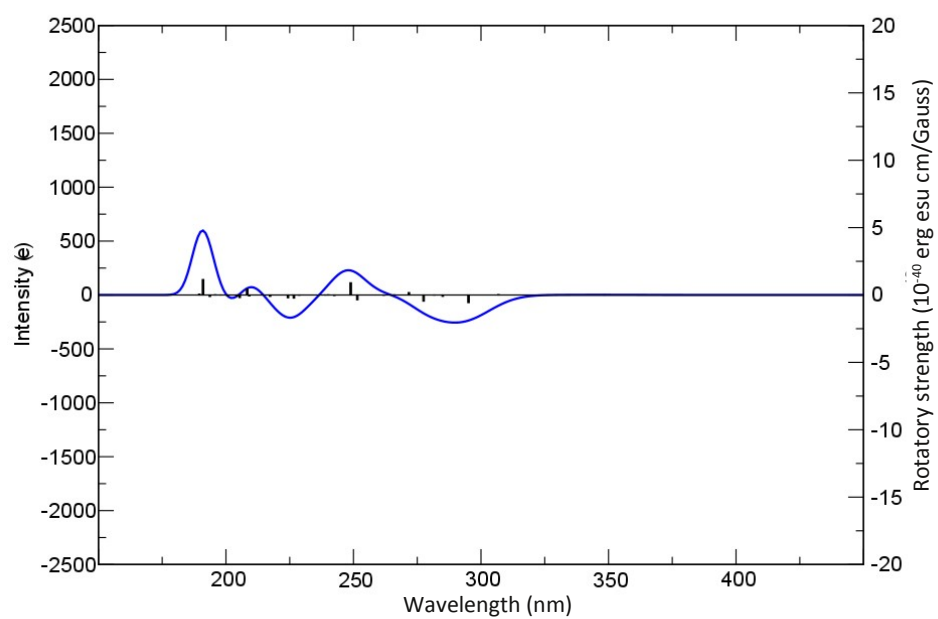

**(P<sub>2</sub>)-DEAp-UV**

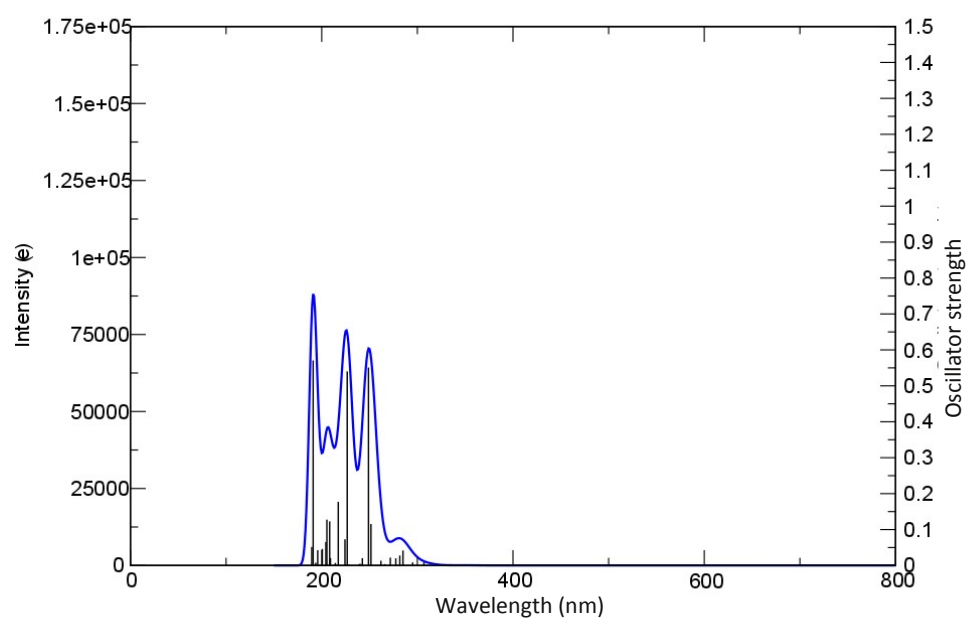

**(P<sub>2</sub>)-DESp-ECD**

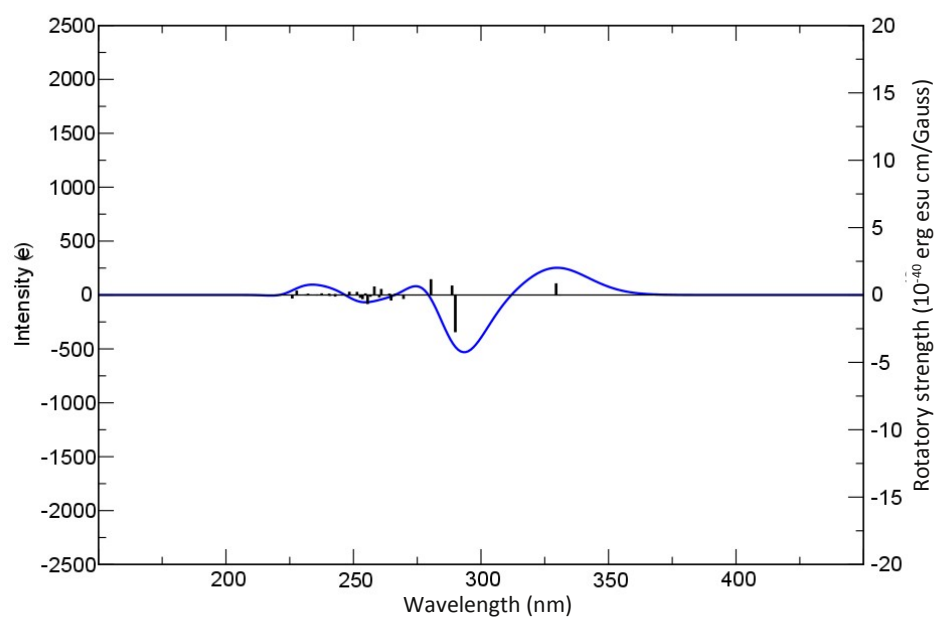

**(P<sub>2</sub>)-DESp-UV**

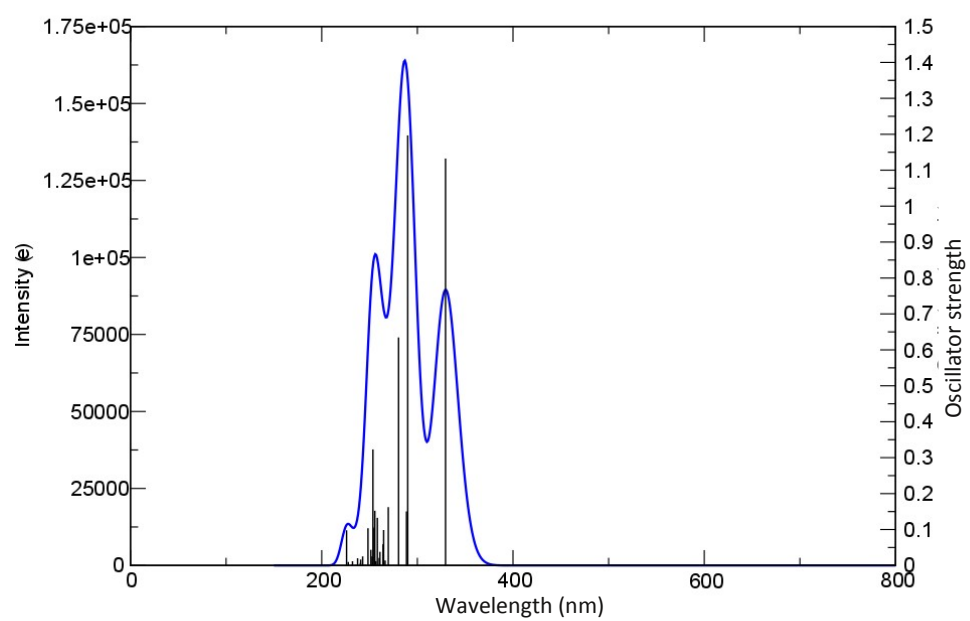



**(P<sub>2</sub>)-DEAbp-ECD**

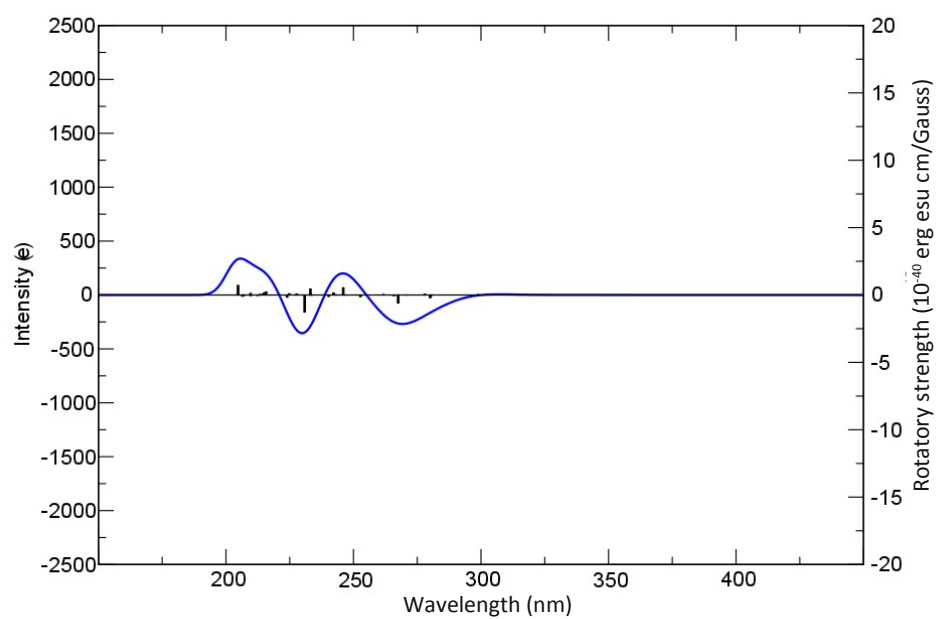

**(P<sub>2</sub>)-DEAbp-UV**

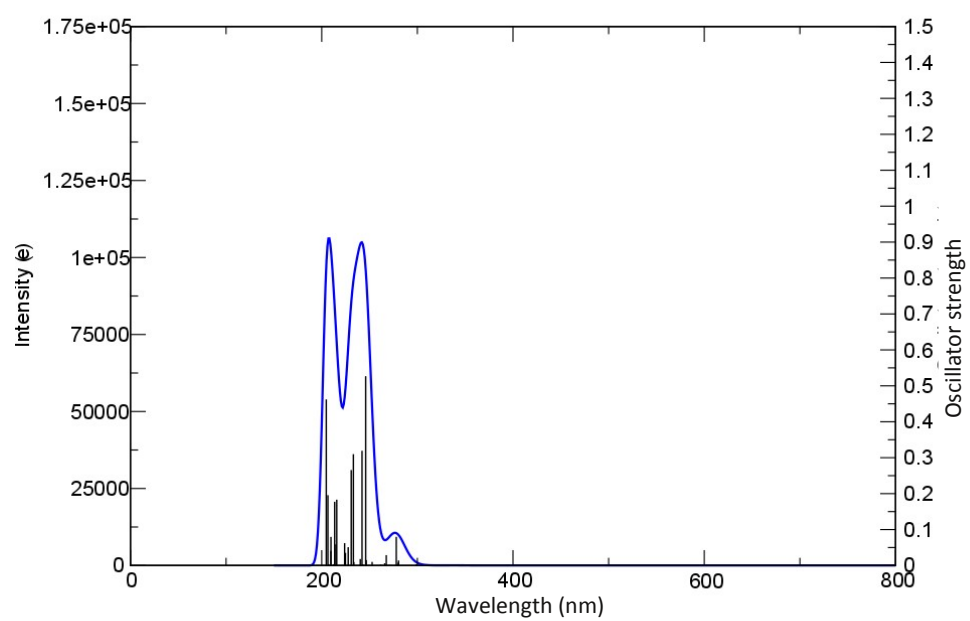

**(P<sub>2</sub>)-DESbp-ECD**

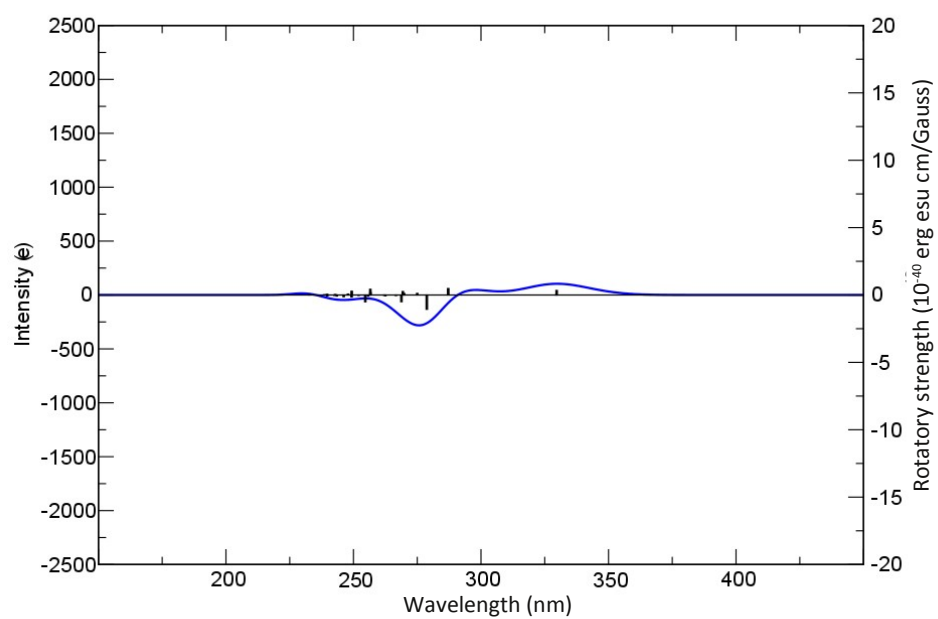

**(P<sub>2</sub>)-DESbp-UV**

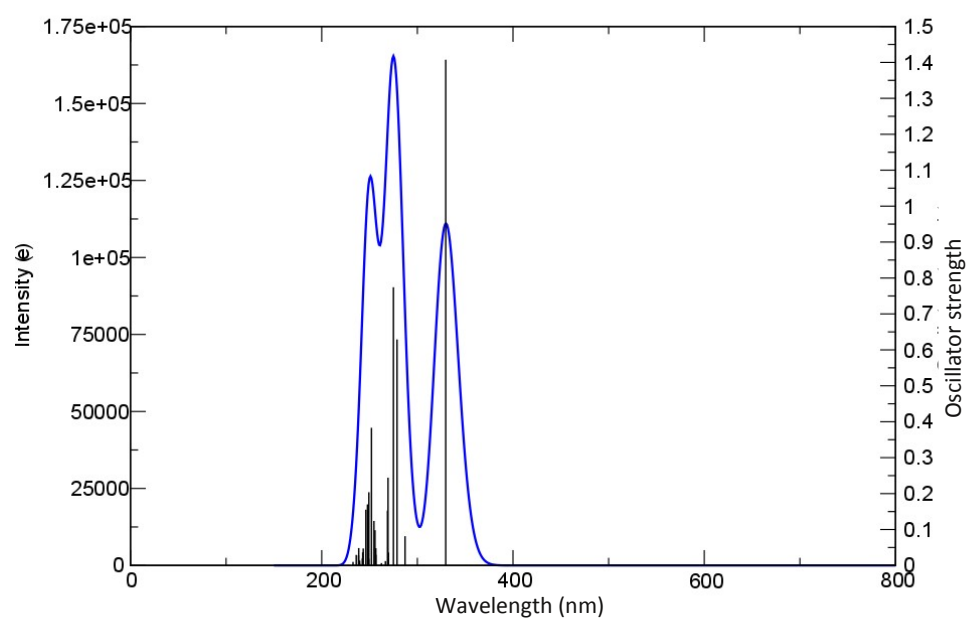

**(P)-DEA-ECD**

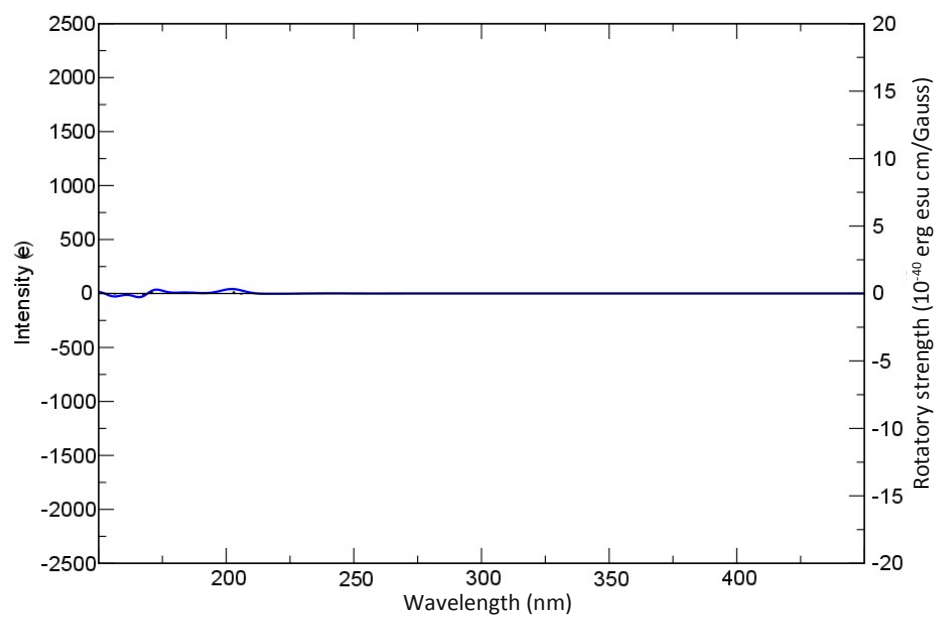

**(P)-DEA-UV**

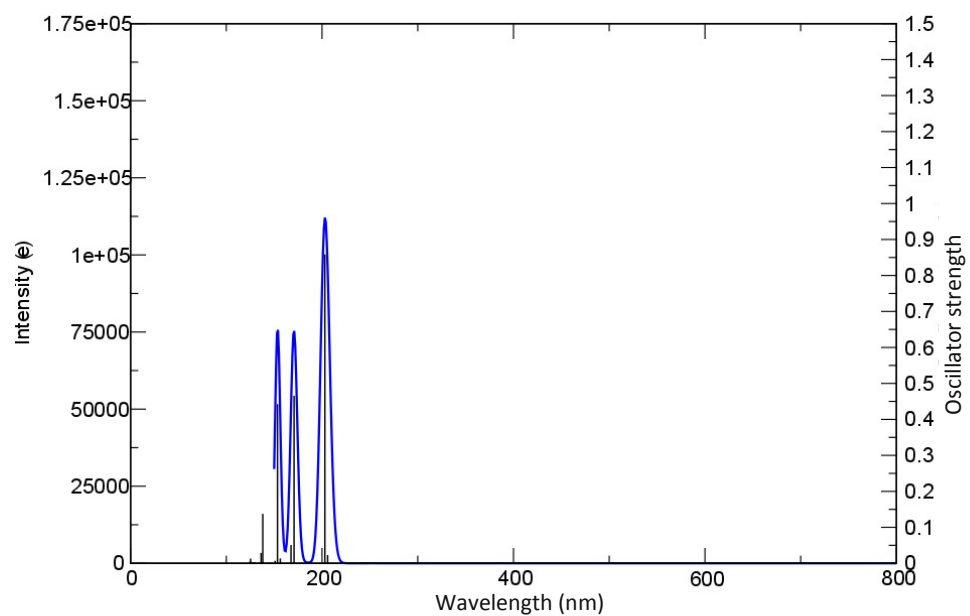

**(P)-DES-ECD**

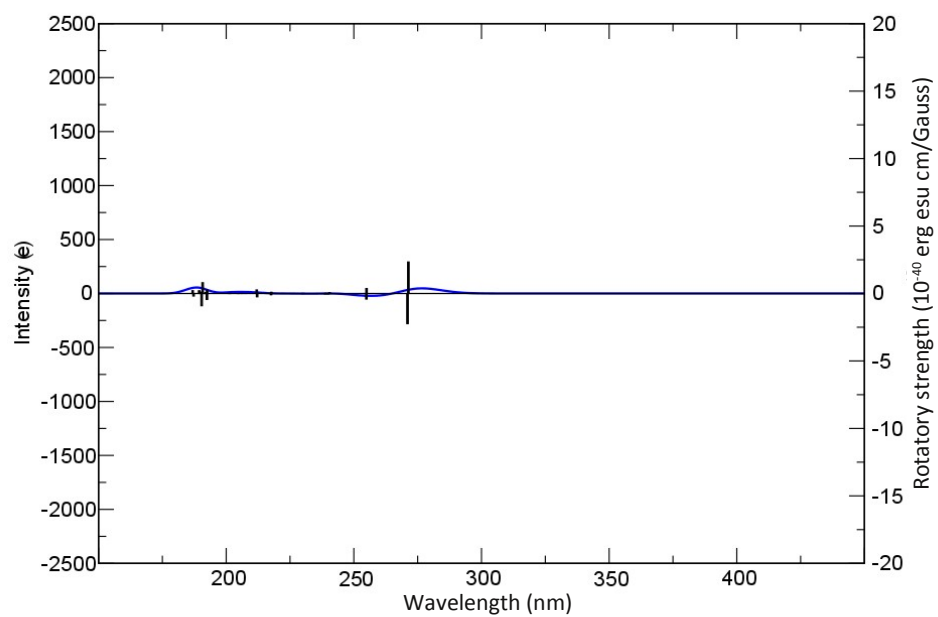

**(P)-DES-UV**

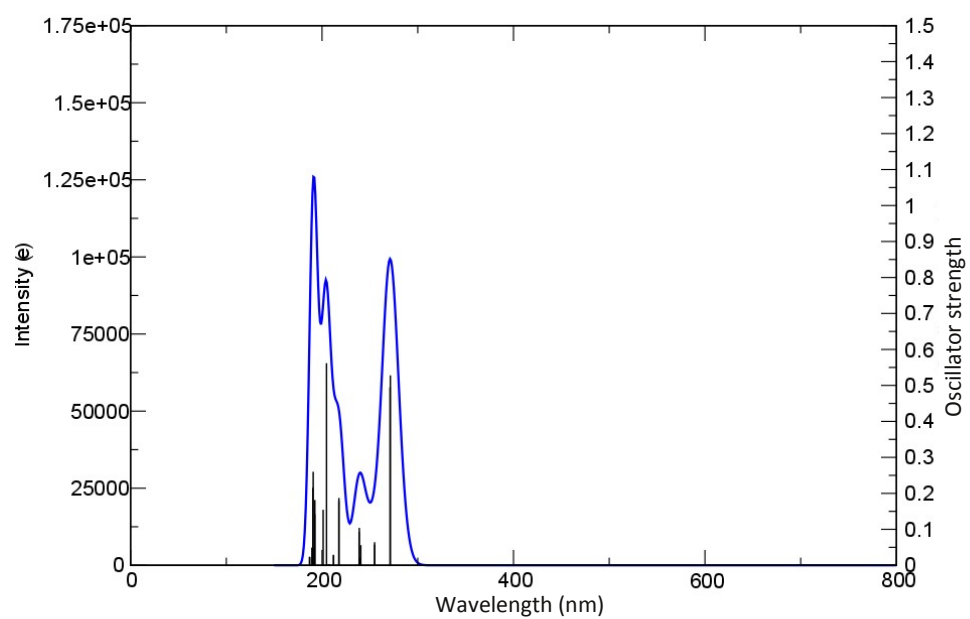

Supplement: Supplementary file 1 [file 3824134]
